# Supplementary material for: Chiral diversification through the assembly of achiral phenylacetylene macrocycles with a two-fold bridge
Source: Royal Society of Chemistry journal article supplement (doi:10.1039/c9sc00972h), 2019-01-01
Supplement: c9sc00972h1.pdf [file c9sc00972h1.pdf]

## Supplementary Information 2

### Chiral diversification through the assembly of achiral phenylacetylene macrocycles with a two-fold bridge

Ryo Katoono,\* Keiichi Kusaka, Yuki Saito, Kazuki Sakamoto and Takanori Suzuki

*Department of Chemistry, Faculty of Science, Hokkaido University*

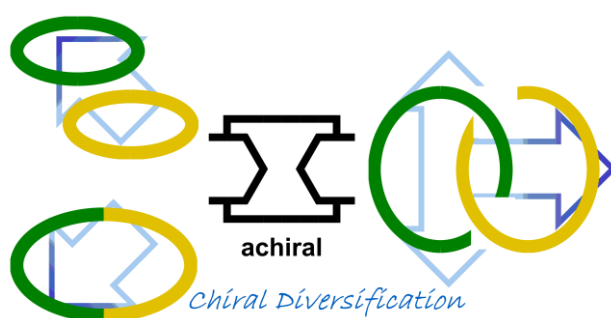

#### Contents

|                                                                                      |         |
|--------------------------------------------------------------------------------------|---------|
| Copies of $^1\text{H}$ and $^{13}\text{C}$ NMR, IR and mass spectra of new compounds | S40-S76 |
| Copies of $^1\text{H}$ NMR spectrum of new compounds (unprotected)                   | S77-S80 |
| Copies of chiral HPLC traces                                                         | S81     |

## $^1\text{H}$ and $^{13}\text{C}$ NMR spectra of new compounds

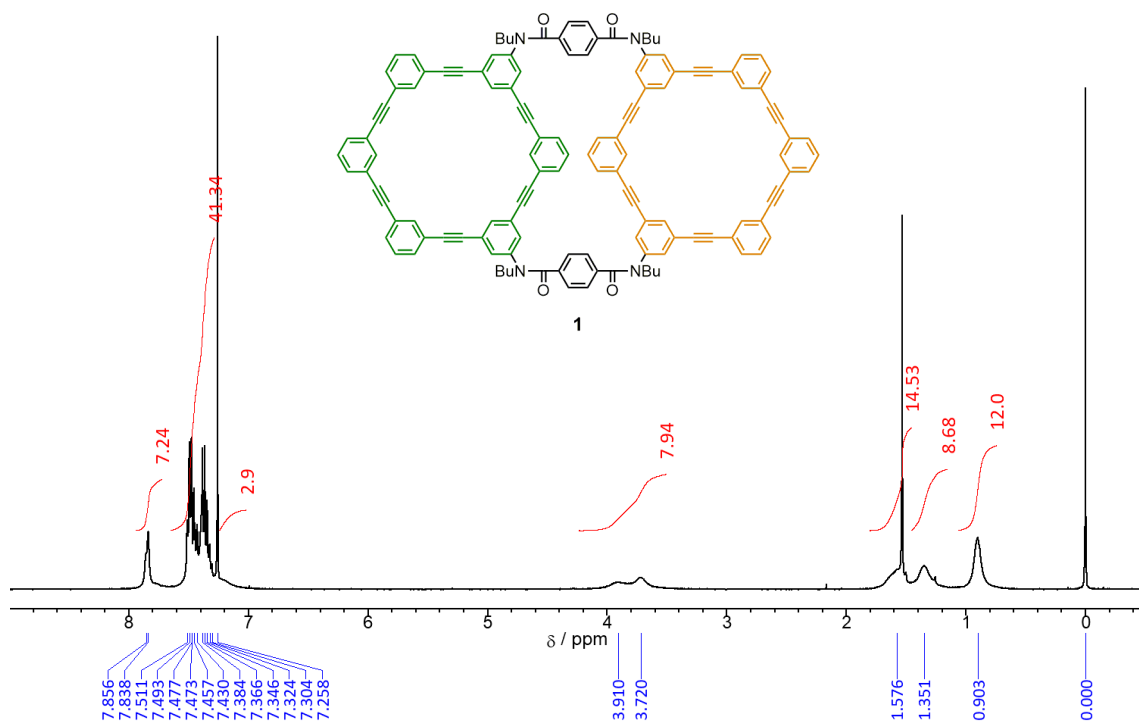

$^1\text{H}$  NMR (400 MHz) spectrum of **1**, measured in chloroform-*d* at 303 K.

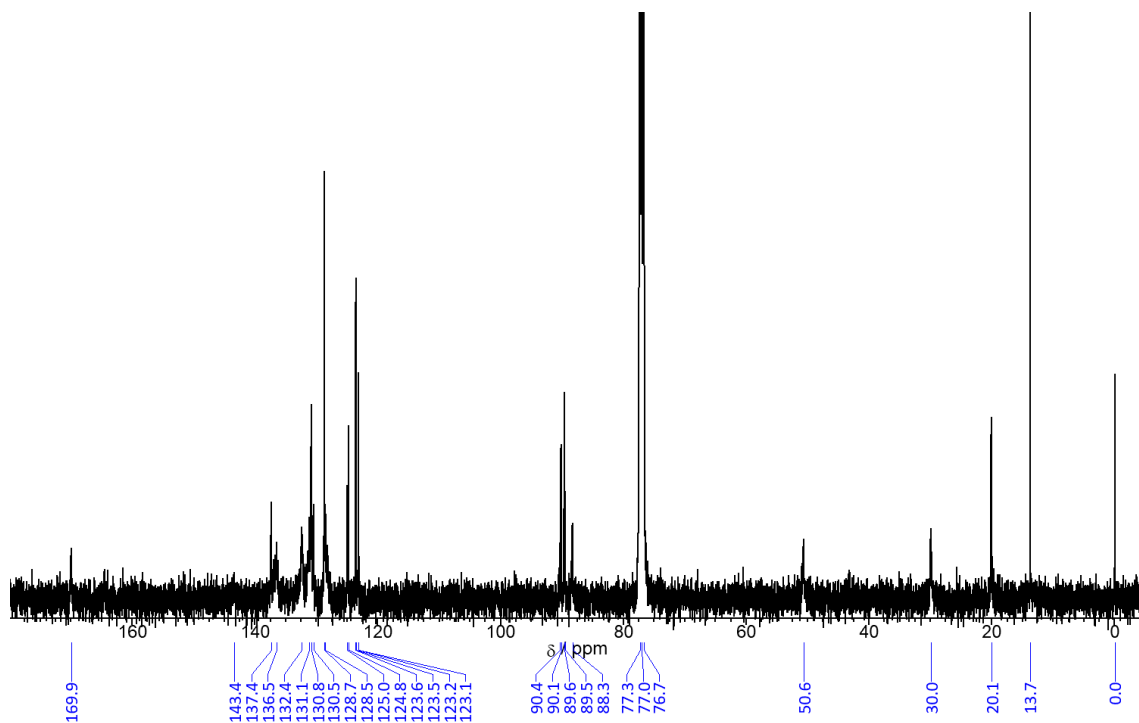

$^{13}\text{C}$  NMR (100 MHz) spectrum of **1**, measured in chloroform-*d* at 313 K.

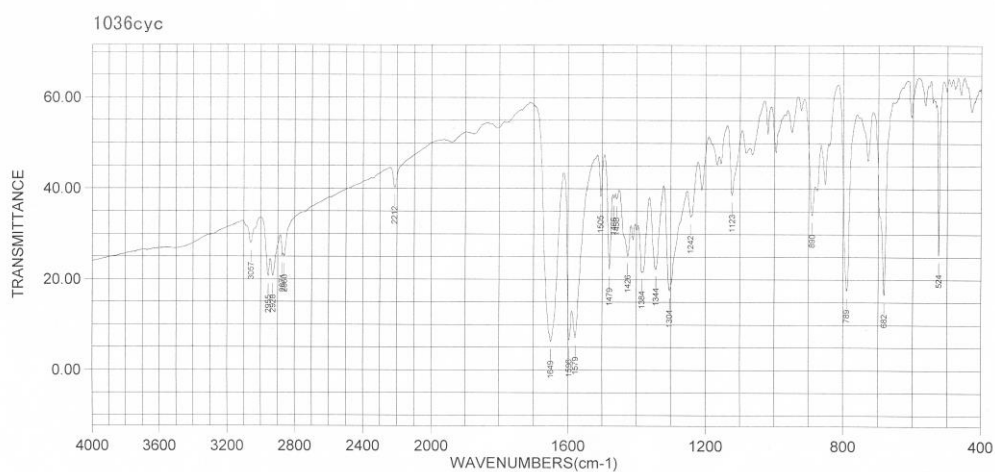

|          |           |         |       |         |       |        |       |
|----------|-----------|---------|-------|---------|-------|--------|-------|
| RESOL    | : 2 cm-1  | 3057.62 | 27.99 | 1479.15 | 22.39 | 789.72 | 17.71 |
| SCANS    | : 5       | 2955.41 | 20.71 | 1466.62 | 38.01 | 682.69 | 16.73 |
| AMP GAIN | : x1      | 2928.41 | 20.78 | 1458.90 | 37.87 | 524.55 | 25.55 |
| P. INT   | : 1 cm-1  | 2871.52 | 25.26 | 1426.12 | 25.26 |        |       |
| BEAM     | : single  | 2860.92 | 25.21 | 1384.66 | 21.65 |        |       |
| S. SPEED | : TGS     | 2212.94 | 40.34 | 1344.16 | 22.33 |        |       |
| M. DATE  | : 11/2/18 | 1649.92 | 6.33  | 1304.62 | 17.57 |        |       |
| F. NAME  | : 測定中のデータ | 1596.79 | 6.63  | 1242.91 | 33.93 |        |       |
|          |           | 1579.43 | 7.15  | 1123.35 | 38.64 |        |       |
|          |           | 1505.19 | 38.39 | 890.96  | 34.26 |        |       |

IR spectrum of 1.

Data: common/Nov06:a00359-7  
 Sample: 3396 Katono / 1036 cyc  
 Experiment Date/Time: 2018/11/06 14:01:57  
 Average[MS(1)] Time:0.44,0.55

Instrument Configuration: FD700-J,JMS-T100GCV  
 Ionization Mode: FD+  
 Acquired m/z Range: 50.00,3200.00  
 Detector Volt: 2700[V]

MS Tune Method Name: FD  
 Agilent7890A Method Name: -

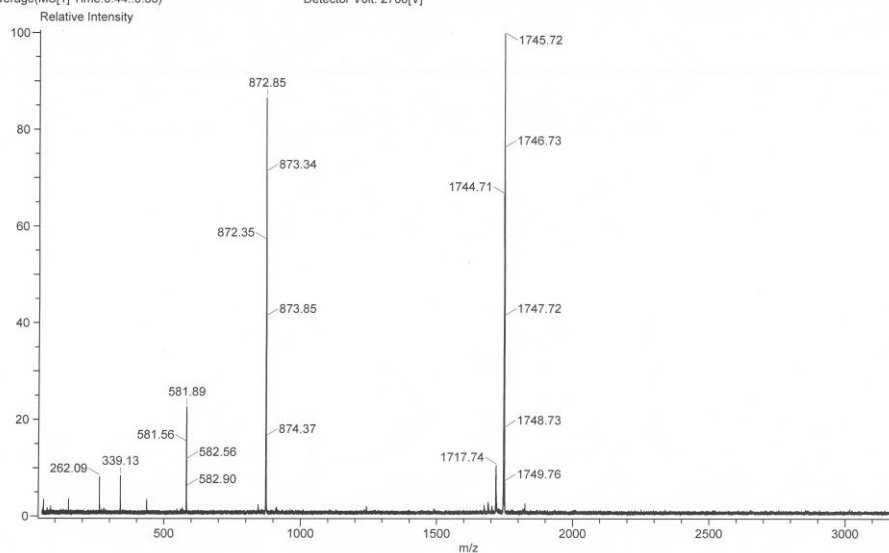

Mass spectrum (FD) of 1.

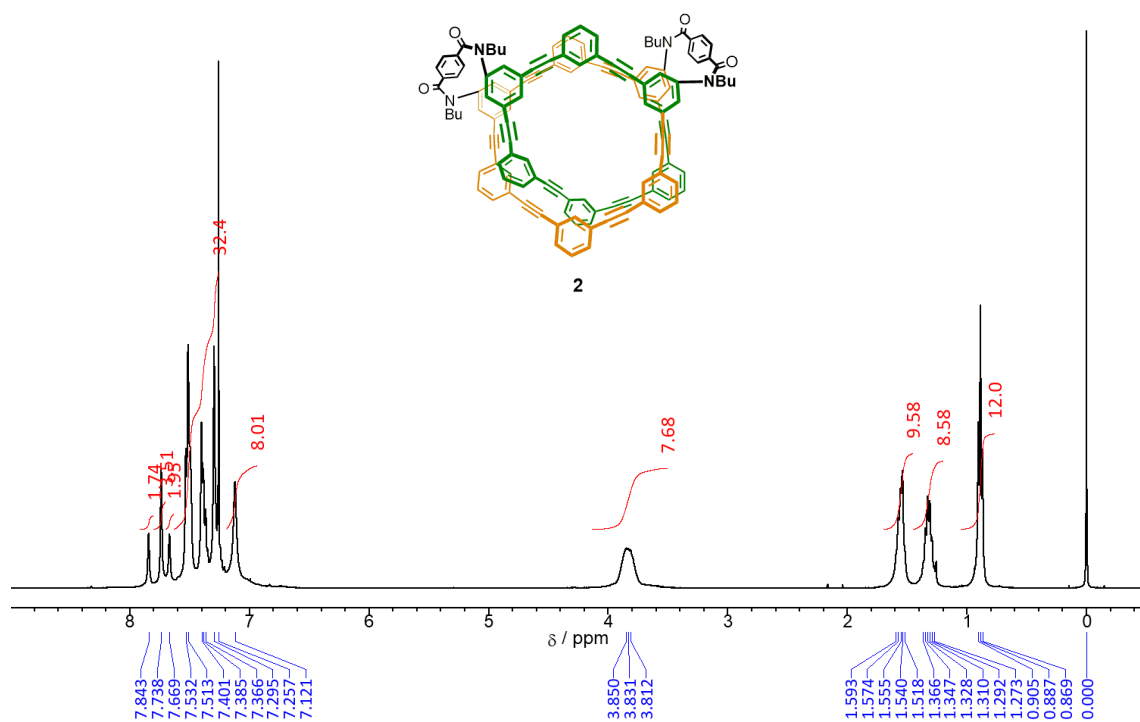

$^1\text{H}$  NMR (400 MHz) spectrum of **2**, measured in chloroform-*d* at 303 K.

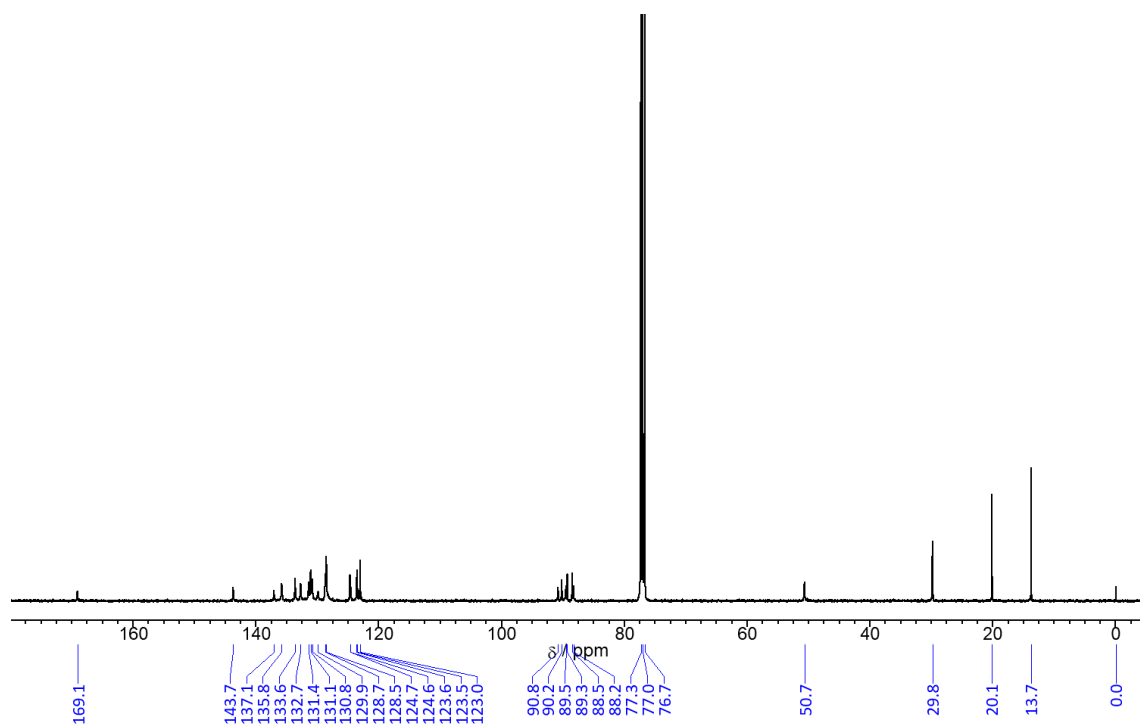

$^{13}\text{C}$  NMR (100 MHz) spectrum of **2**, measured in chloroform-*d* at 313 K.

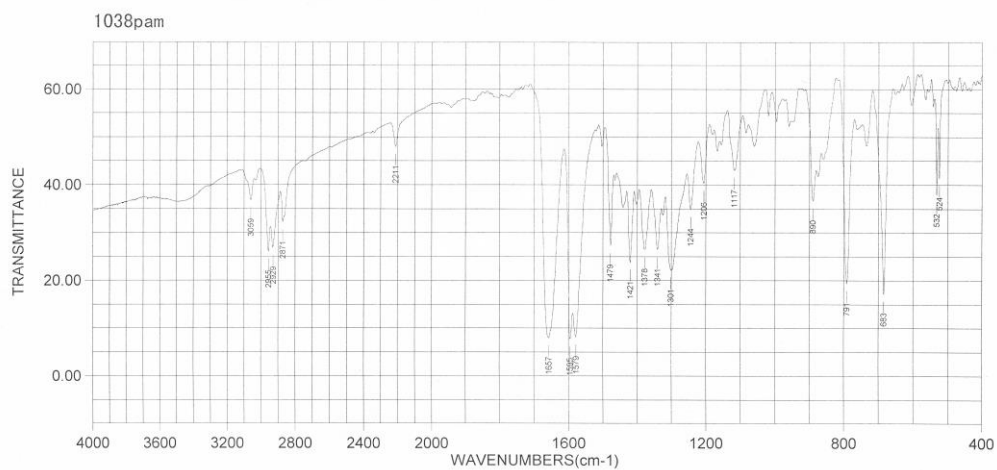

|          |           |      |         |       |         |       |        |       |
|----------|-----------|------|---------|-------|---------|-------|--------|-------|
| RESOL    | : 2       | cm-1 | 3059.55 | 36.89 | 1378.87 | 26.56 | 524.55 | 41.53 |
| SCANS    | : 5       |      | 2955.41 | 26.11 | 1341.26 | 26.55 |        |       |
| AMPGAIN  | : x1      |      | 2929.38 | 26.97 | 1301.73 | 22.21 |        |       |
| P. INT   | : 1       | cm-1 | 2871.52 | 32.30 | 1244.84 | 34.95 |        |       |
| BEAM     | : single  |      | 2211.98 | 48.06 | 1206.27 | 40.44 |        |       |
| S. SPEED | : TGS     |      | 1657.54 | 8.01  | 1117.56 | 43.07 |        |       |
| M. DATE  | : 11/2/18 |      | 1595.83 | 7.80  | 890.96  | 36.70 |        |       |
| F. NAME  | : 測定中のデータ |      | 1579.43 | 8.22  | 791.65  | 19.40 |        |       |
|          |           |      | 1479.15 | 27.38 | 683.65  | 17.27 |        |       |
|          |           |      | 1421.30 | 23.87 | 532.26  | 38.10 |        |       |

IR spectrum of 2.

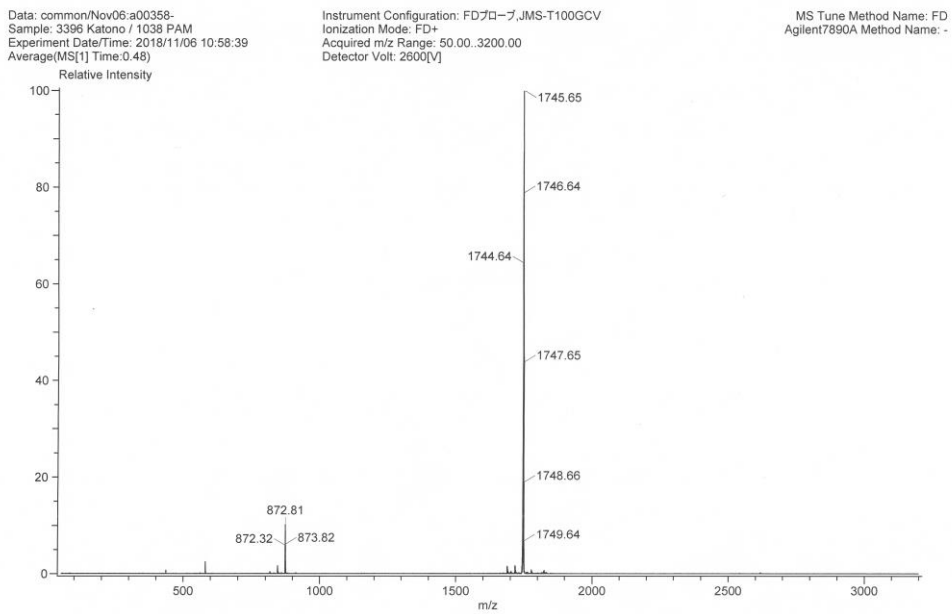

Mass spectrum (FD) of 2.

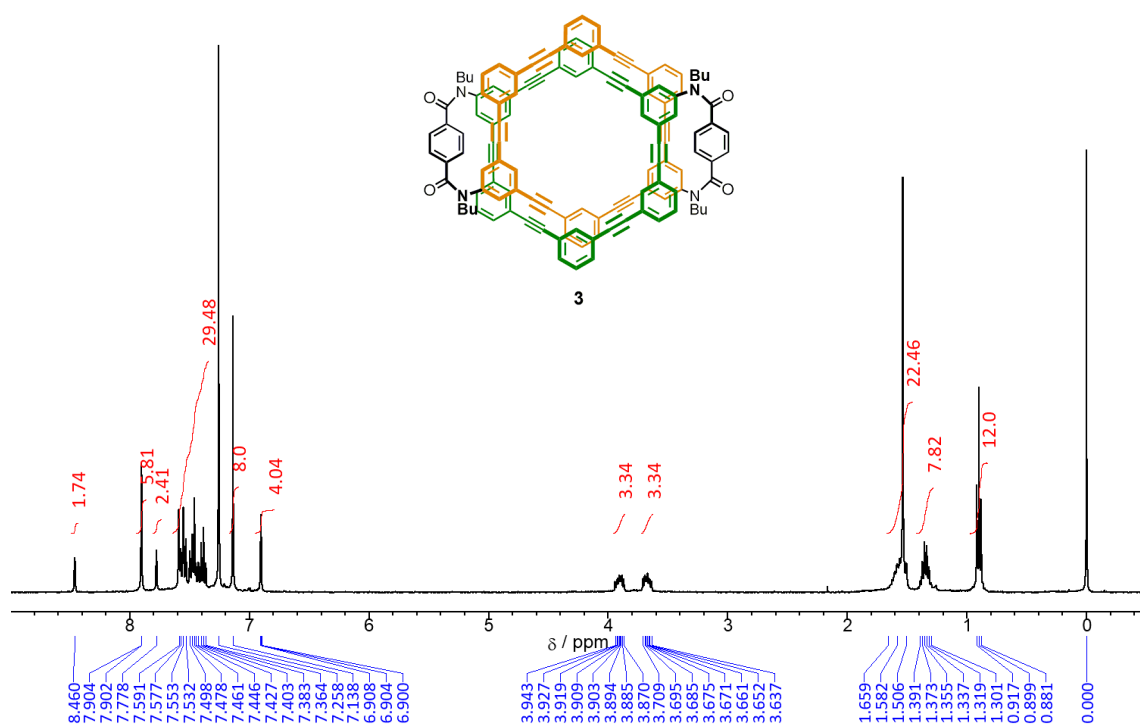

$^1\text{H}$  NMR (400 MHz) spectrum of ( $\pm$ )-**3**, measured in chloroform-*d* at 303 K.

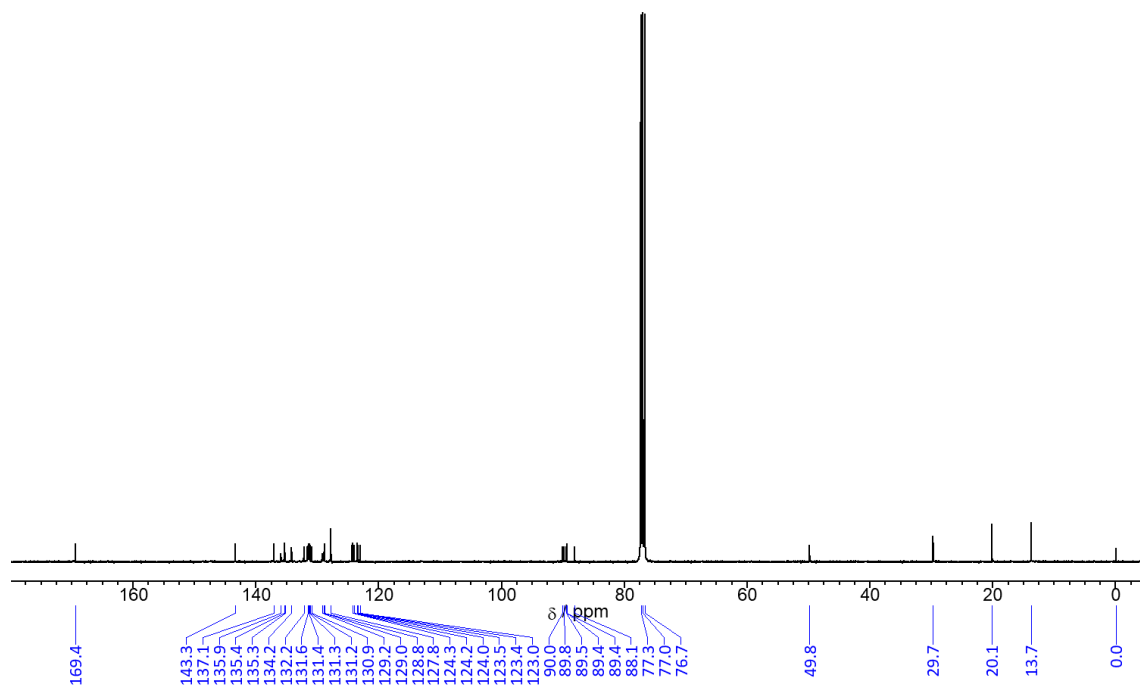

$^{13}\text{C}$  NMR (100 MHz) spectrum of ( $\pm$ )-**3**, measured in chloroform-*d* at 313 K.

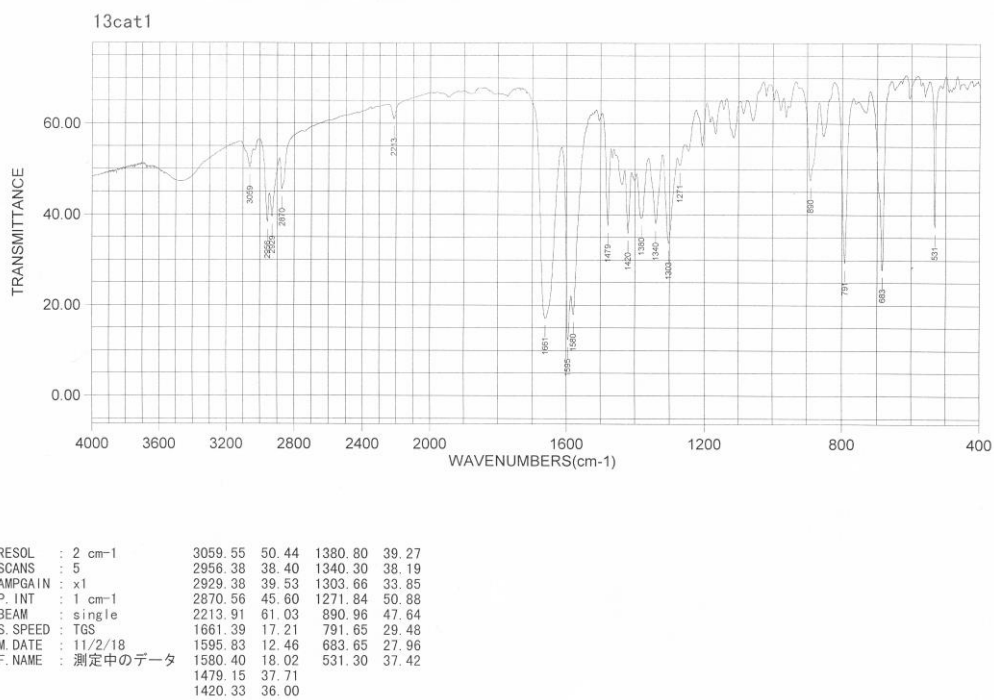

IR spectrum of ( $\pm$ )-3.

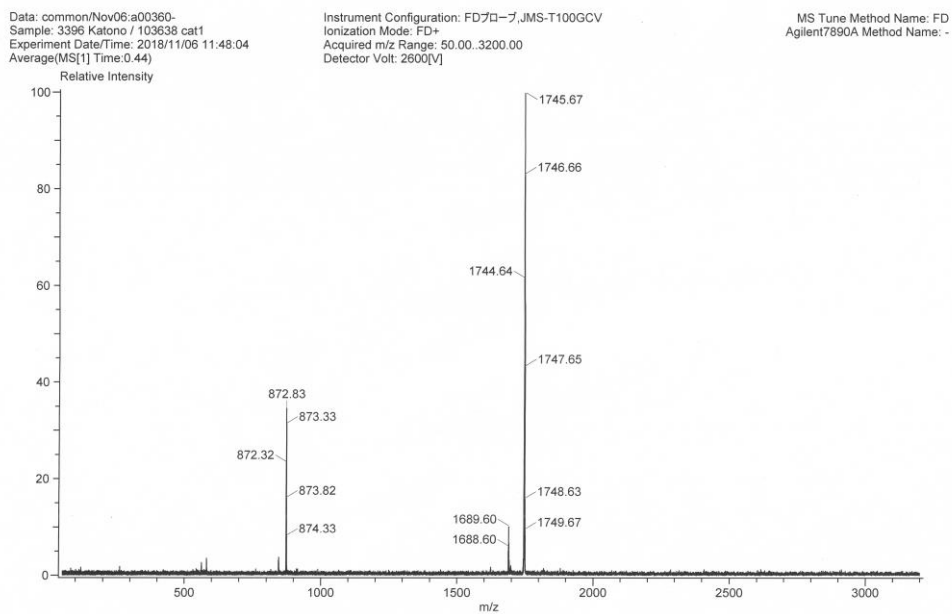

Mass spectrum (FD) of ( $\pm$ )-3.

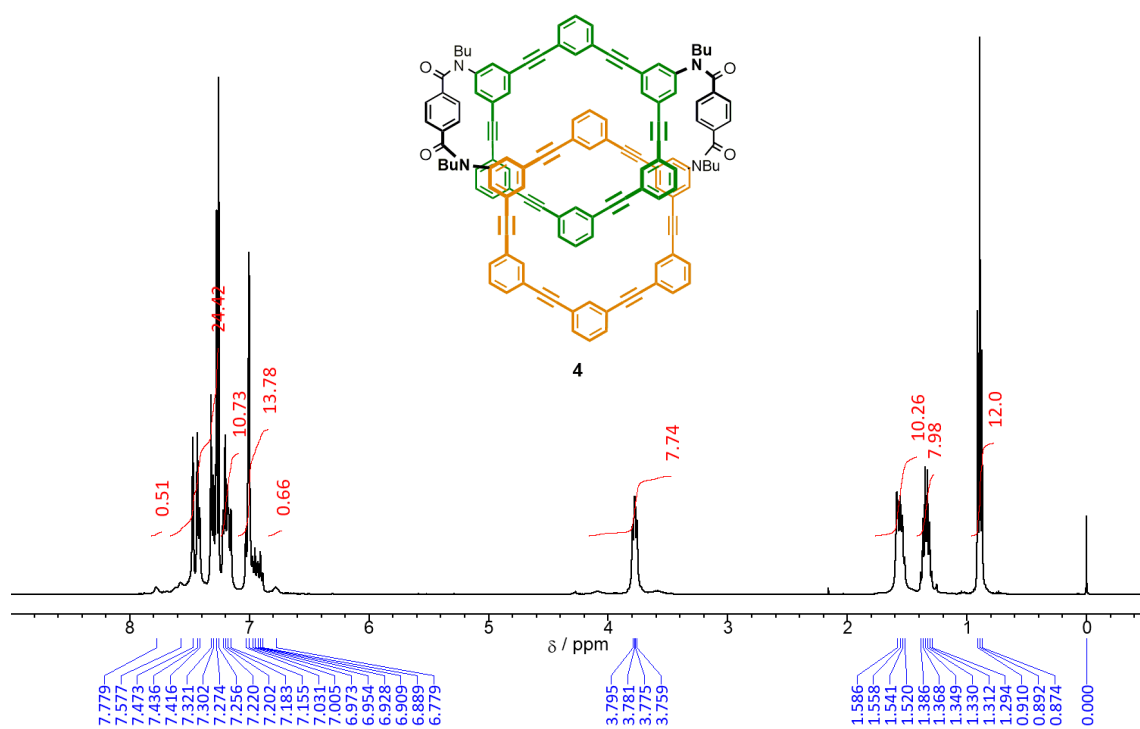

$^1\text{H}$  NMR (400 MHz) spectrum of ( $\pm$ )-4, measured in chloroform-*d* at 303 K.

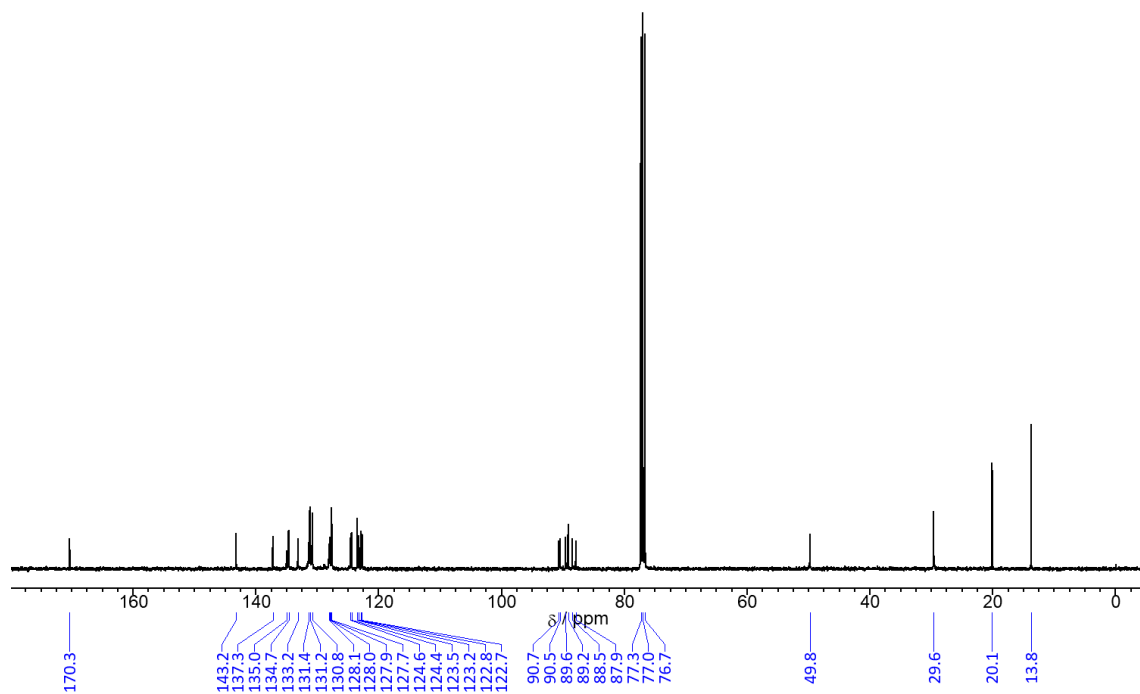

$^{13}\text{C}$  NMR (100 MHz) spectrum of ( $\pm$ )-4, measured in chloroform-*d* at room temperature.



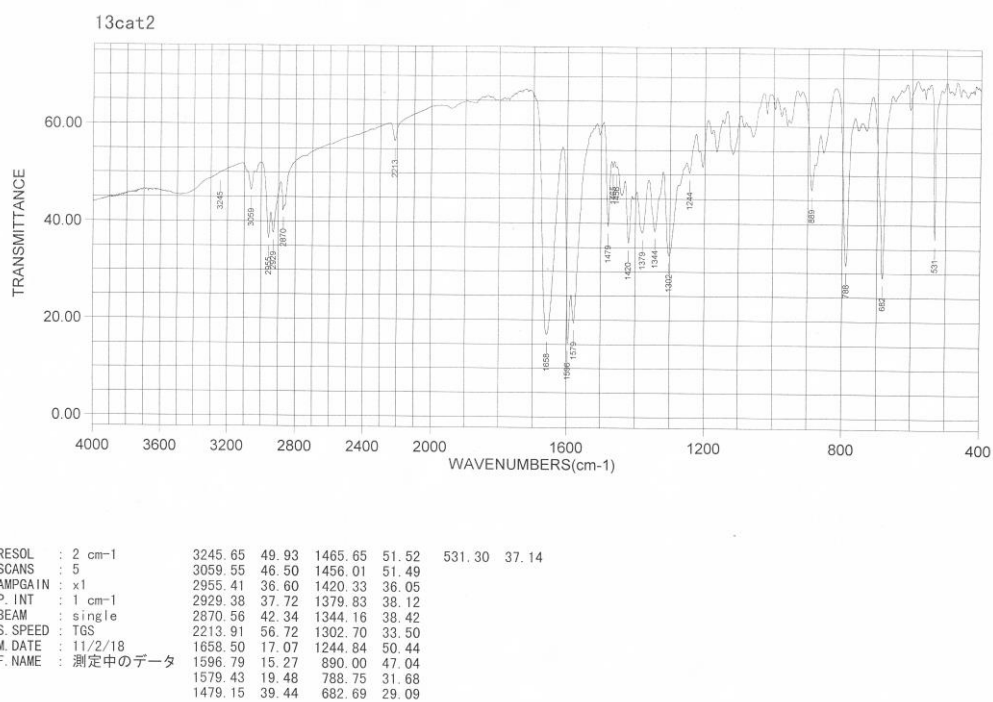

IR spectrum of ( $\pm$ )-4.

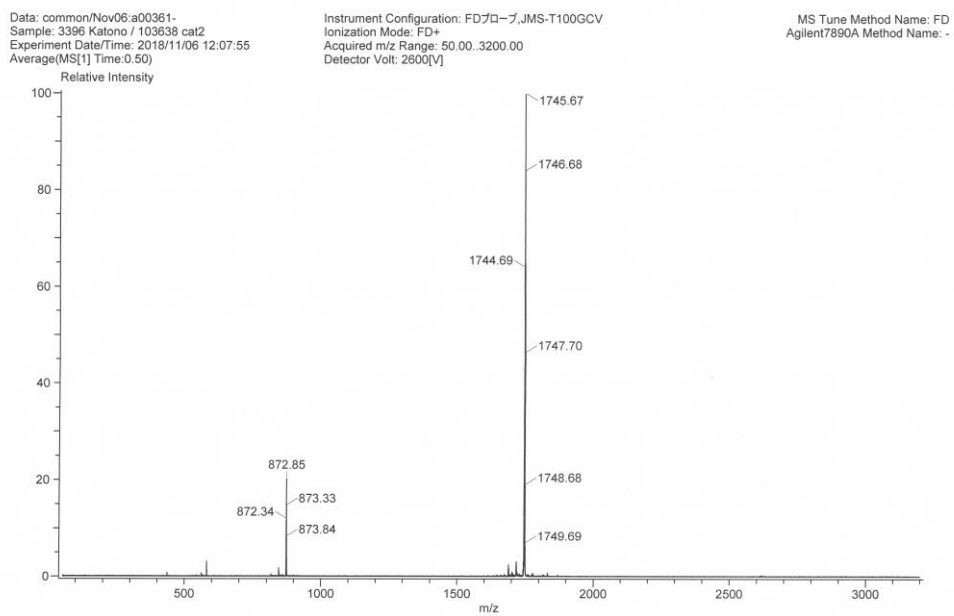

Mass spectrum (FD) of ( $\pm$ )-4.

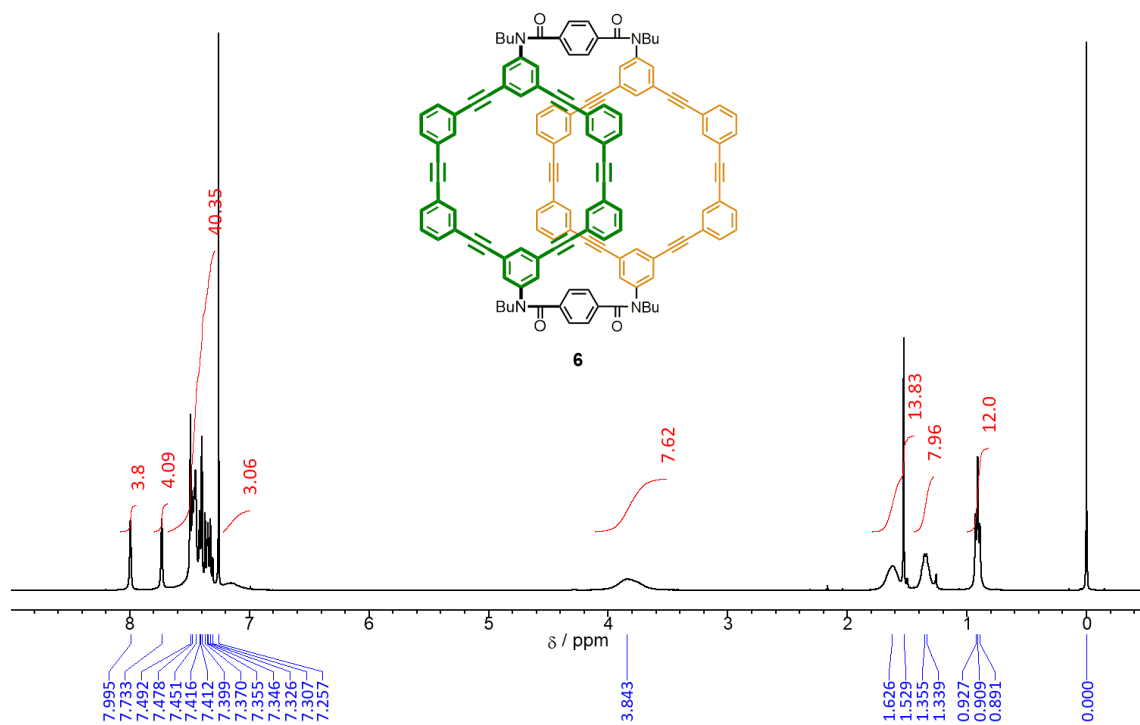

<sup>1</sup>H NMR (400 MHz) spectrum of **6**, measured in chloroform-*d* at 303 K.

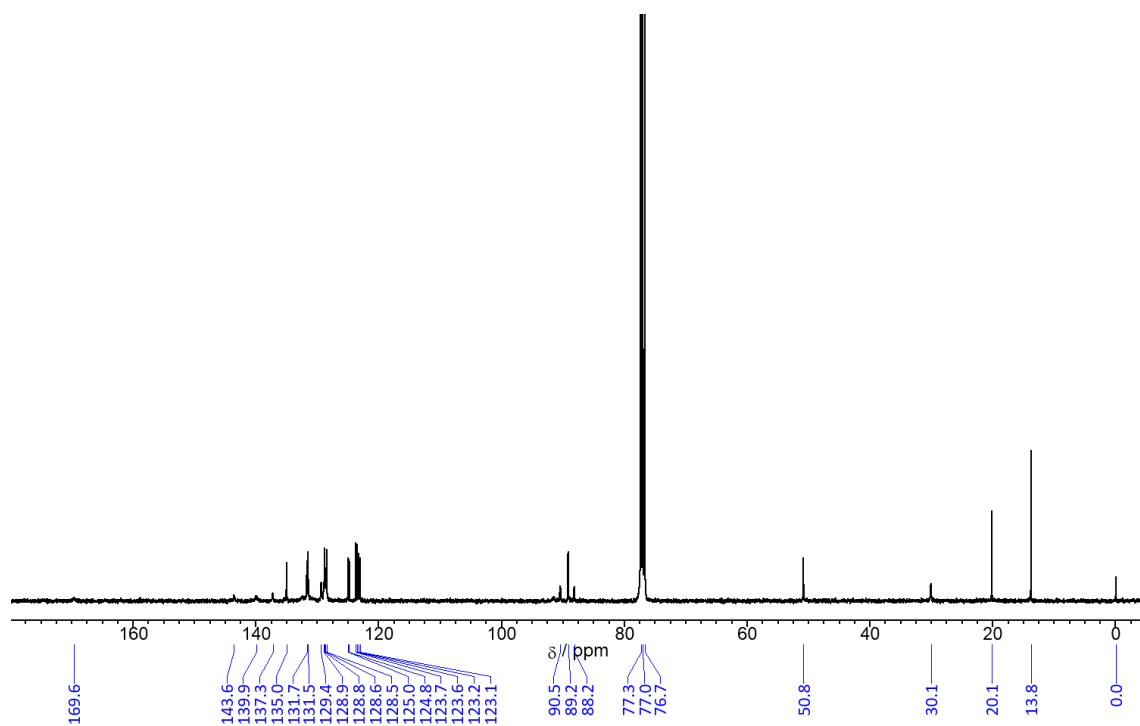

<sup>13</sup>C NMR (100 MHz) spectrum of **6**, measured in chloroform-*d* at 313 K.

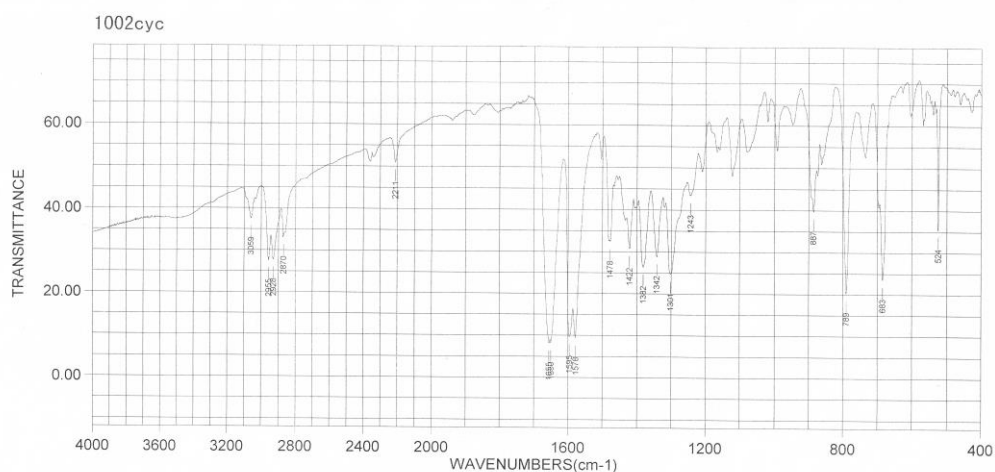

|          |           |         |       |         |       |
|----------|-----------|---------|-------|---------|-------|
| RESOL    | : 2 cm-1  | 3059.55 | 37.59 | 1422.26 | 30.82 |
| SCANS    | : 5       | 2955.41 | 27.62 | 1382.73 | 26.47 |
| AMP GAIN | : x1      | 2928.41 | 27.80 | 1342.23 | 28.88 |
| P. INT   | : 1 cm-1  | 2870.56 | 33.07 | 1301.73 | 24.77 |
| BEAM     | : single  | 2211.98 | 51.06 | 1243.88 | 43.43 |
| S. SPEED | : TGS     | 1655.61 | 8.20  | 887.11  | 39.74 |
| M. DATE  | : 11/2/18 | 1650.79 | 8.31  | 789.72  | 20.39 |
| F. NAME  | : 測定中のデータ | 1595.83 | 9.79  | 683.65  | 23.60 |
|          |           | 1578.47 | 9.46  | 524.55  | 35.52 |
|          |           | 1478.19 | 32.49 |         |       |

IR spectrum of 6.

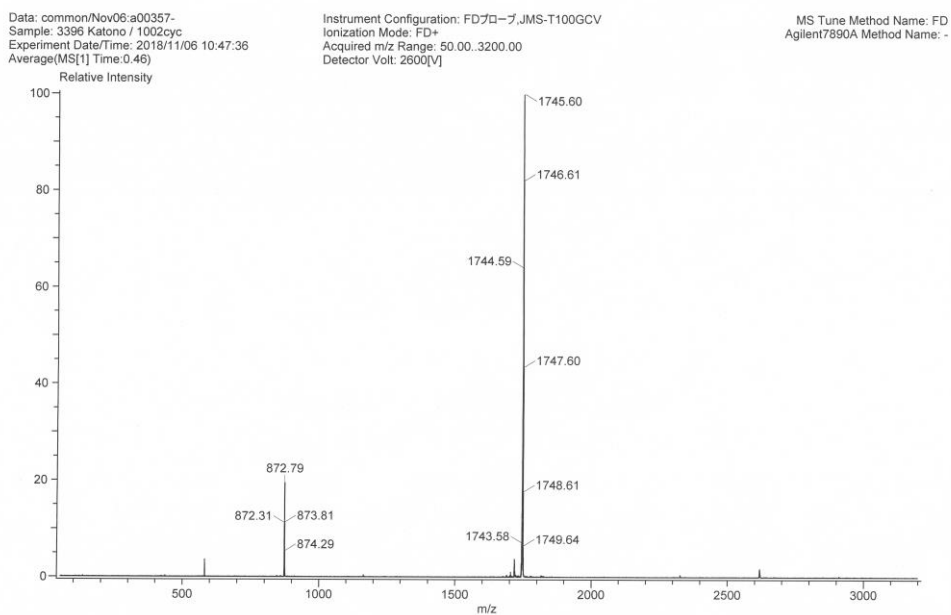

Mass spectrum (FD) of 6.

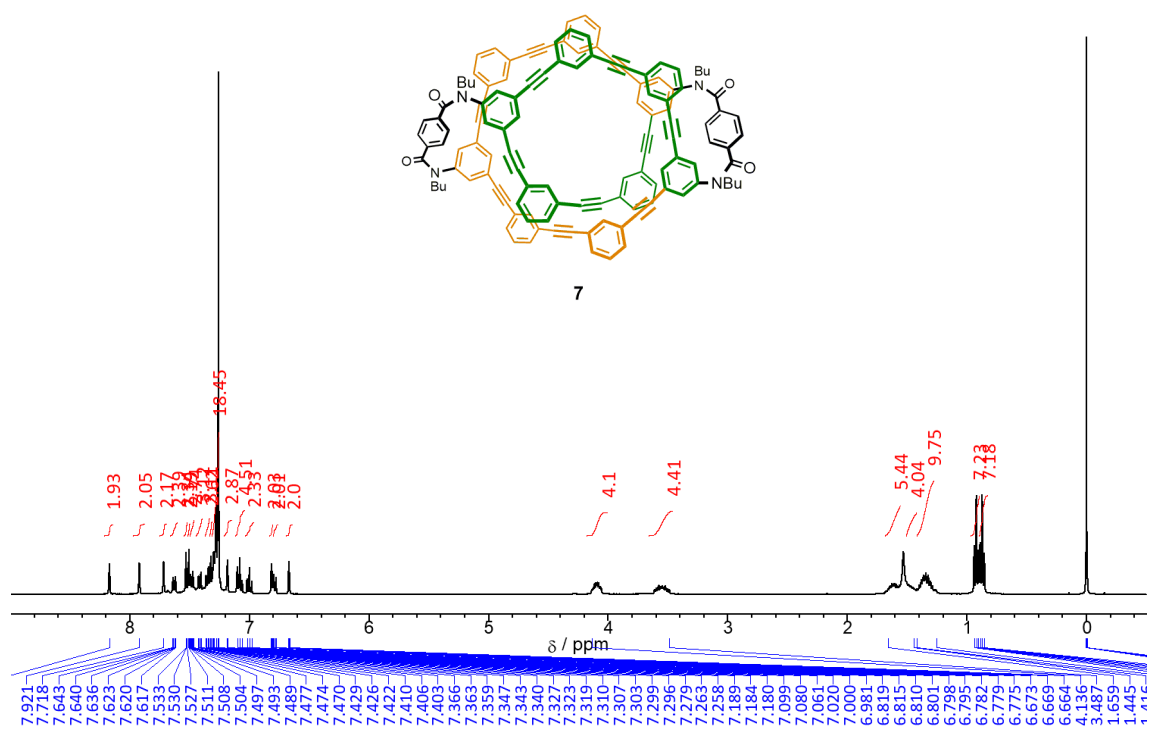

$^1\text{H}$  NMR (400 MHz) spectrum of **7**, measured in chloroform-*d* at 303 K.

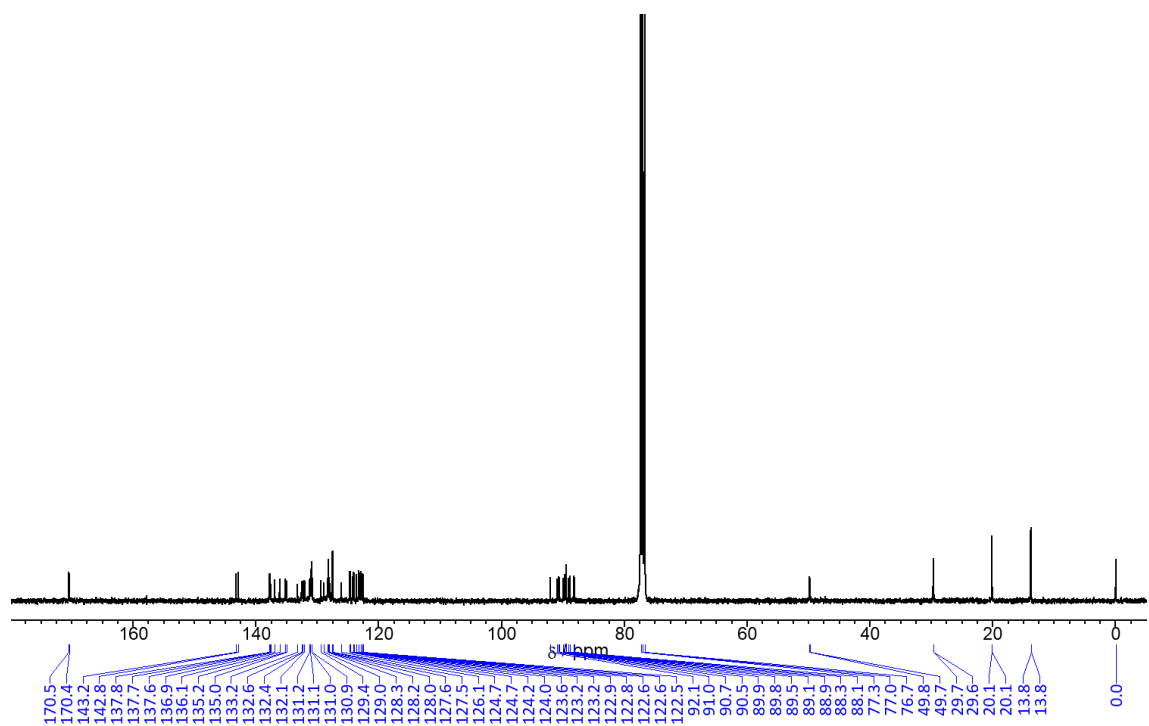

$^{13}\text{C}$  NMR (100 MHz) spectrum of **7**, measured in chloroform-*d* at room temperature.

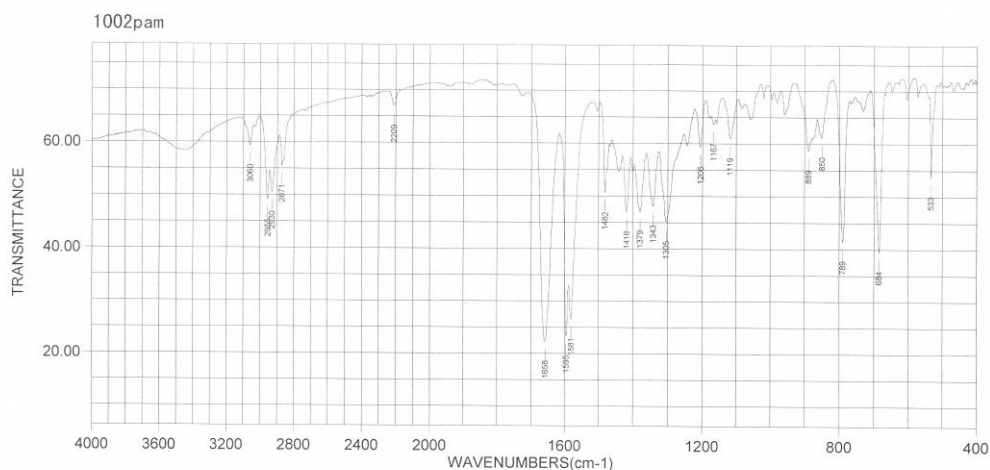

|          |                      |         |       |         |       |        |       |
|----------|----------------------|---------|-------|---------|-------|--------|-------|
| RESOL    | : 2 cm <sup>-1</sup> | 3060.51 | 59.30 | 1379.83 | 47.11 | 533.23 | 53.77 |
| SCANS    | : 5                  | 2955.41 | 49.06 | 1343.19 | 48.12 |        |       |
| AMPGAIN  | : x1                 | 2930.34 | 50.44 | 1305.59 | 45.14 |        |       |
| P. INT   | : 1 cm <sup>-1</sup> | 2871.52 | 55.52 | 1206.27 | 59.32 |        |       |
| BEAM     | : single             | 2209.09 | 66.94 | 1167.70 | 63.71 |        |       |
| S. SPEED | : TGS                | 1658.50 | 22.31 | 1119.49 | 60.97 |        |       |
| M. DATE  | : 11/2/18            | 1595.83 | 23.34 | 889.03  | 58.69 |        |       |
| F. NAME  | : 測定中のデータ            | 1581.36 | 26.55 | 850.46  | 61.14 |        |       |
|          |                      | 1482.04 | 50.58 | 789.72  | 41.46 |        |       |
|          |                      | 1418.40 | 47.01 | 684.61  | 39.52 |        |       |

IR spectrum of 7.

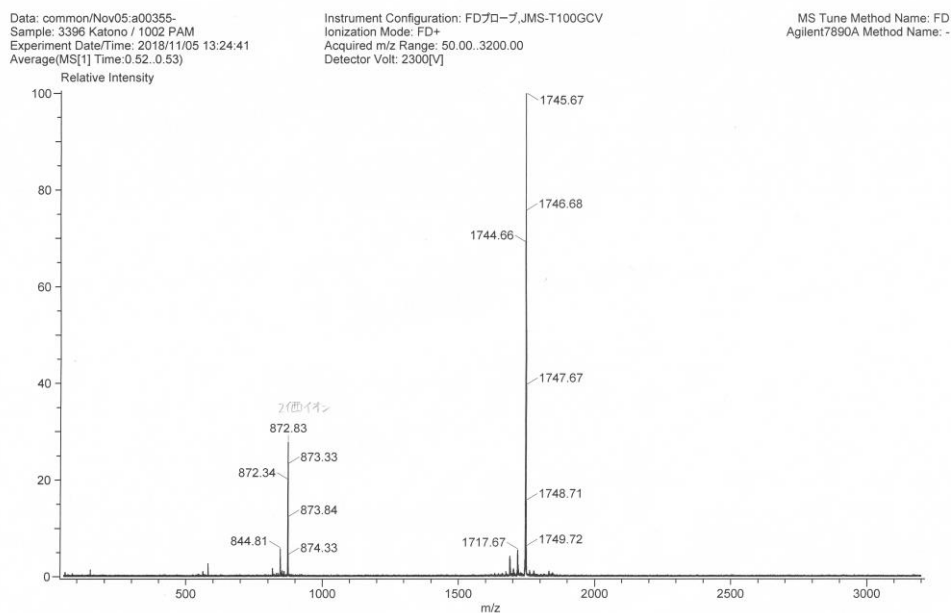

Mass spectrum (FD) of 7.

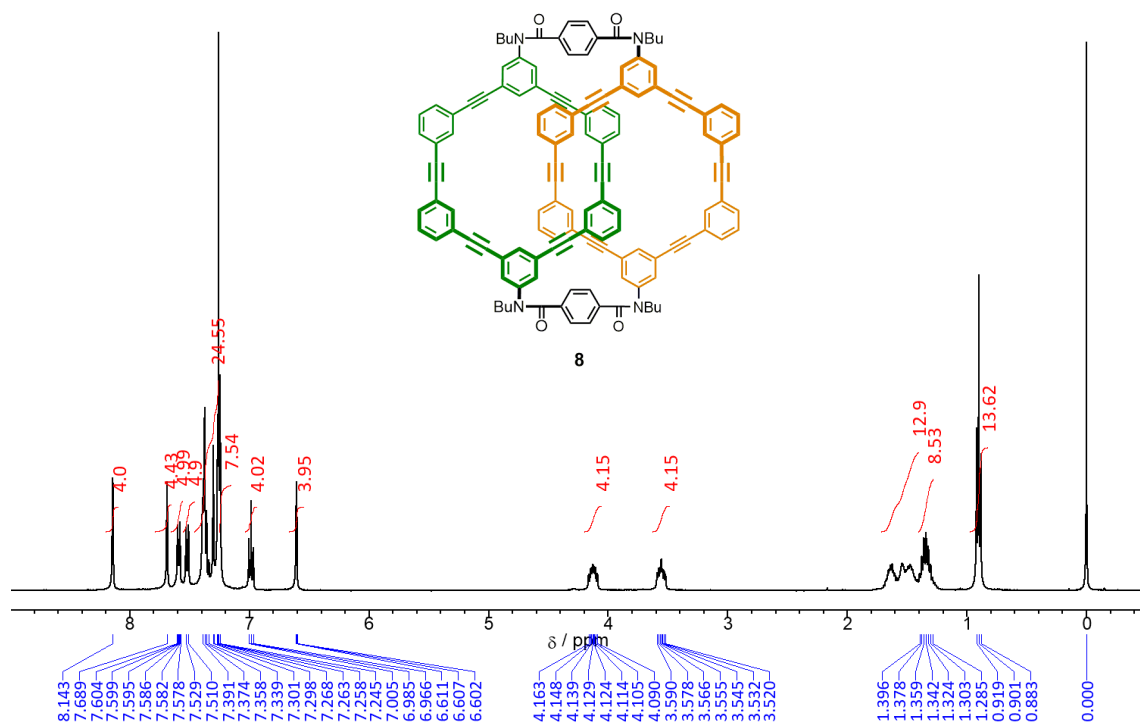

<sup>1</sup>H NMR (400 MHz) spectrum of ( $\pm$ )-**8**, measured in chloroform-*d* at 303 K.

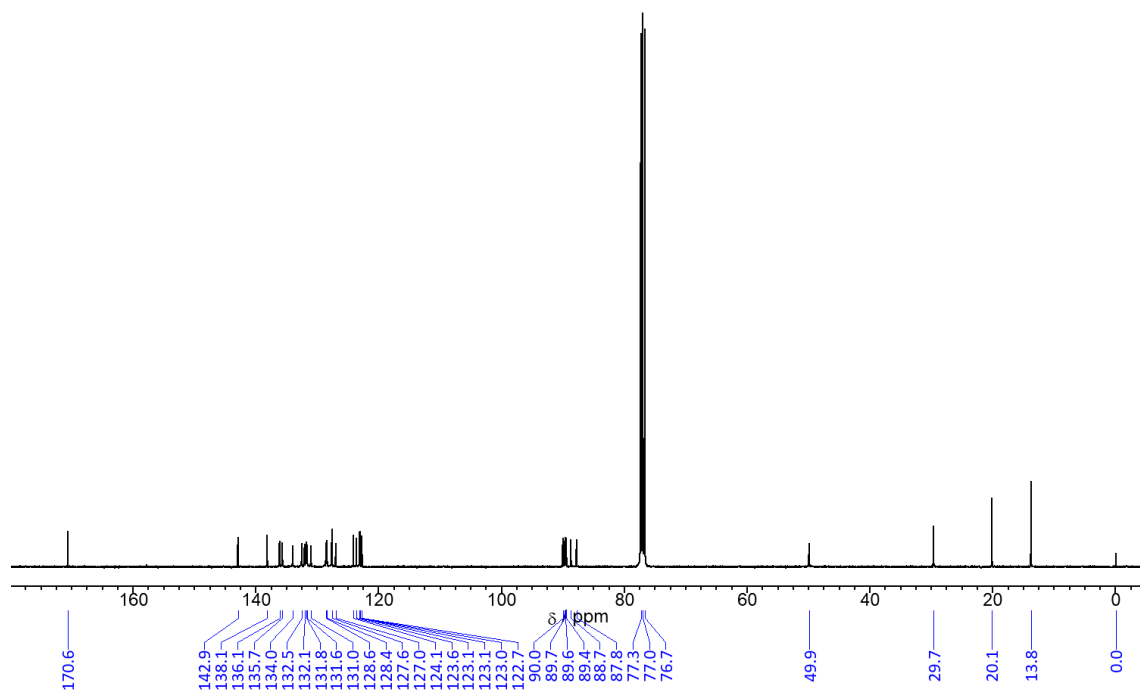

<sup>13</sup>C NMR (100 MHz) spectrum of ( $\pm$ )-**8**, measured in chloroform-*d* at room temperature.

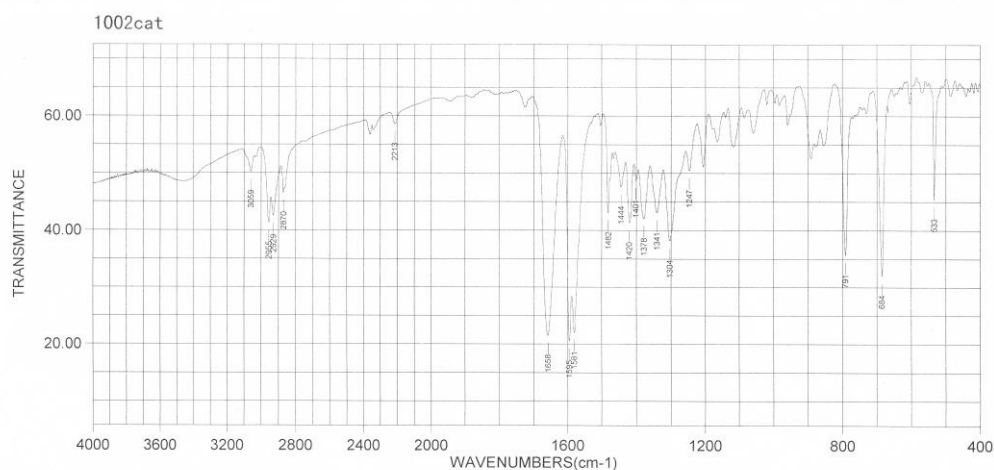

|          |           |         |       |         |       |
|----------|-----------|---------|-------|---------|-------|
| RESOL    | : 2 cm-1  | 3059.55 | 50.29 | 1420.33 | 41.31 |
| SCANS    | : 5       | 2955.41 | 41.31 | 1401.05 | 48.78 |
| AMPGAIN  | : x1      | 2929.38 | 42.53 | 1378.87 | 42.06 |
| P. INT   | : 1 cm-1  | 2870.56 | 46.54 | 1341.26 | 43.09 |
| BEAM     | : single  | 2213.91 | 58.66 | 1304.62 | 38.20 |
| S. SPEED | : TGS     | 1658.50 | 21.54 | 1247.73 | 50.51 |
| M. DATE  | : 11/2/18 | 1595.83 | 20.55 | 791.65  | 35.69 |
| F. NAME  | : 測定中のデータ | 1482.04 | 43.11 | 533.23  | 45.47 |
|          |           | 1444.44 | 47.59 |         |       |

IR spectrum of ( $\pm$ )-8.

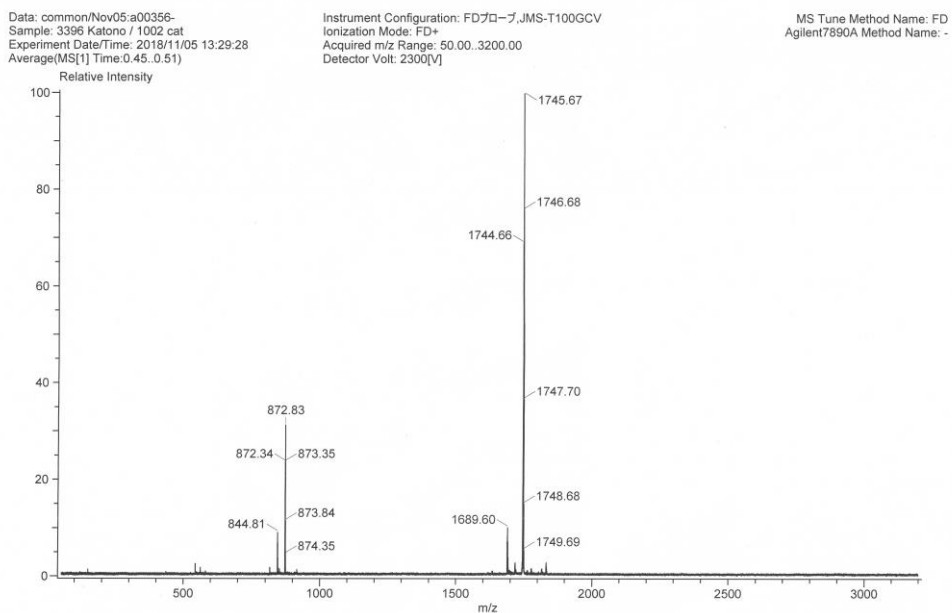

Mass spectrum (FD) of ( $\pm$ )-8.

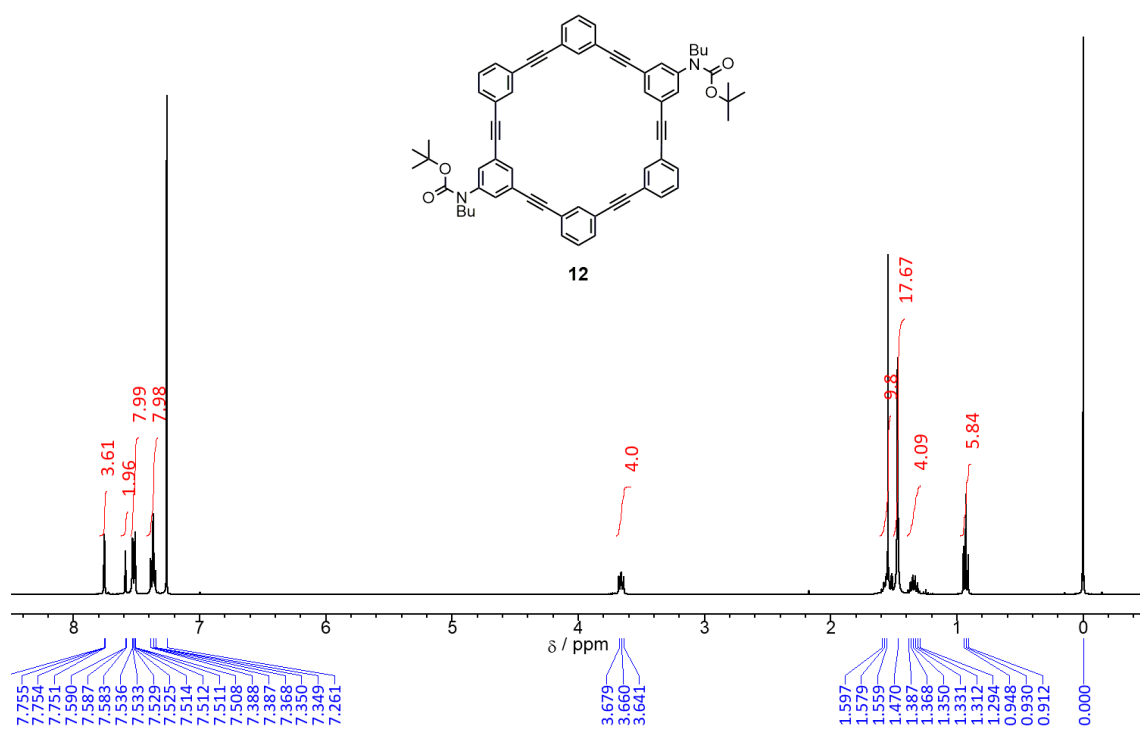

$^1\text{H}$  NMR (400 MHz) spectrum of **12**, measured in chloroform-*d* at room temperature.

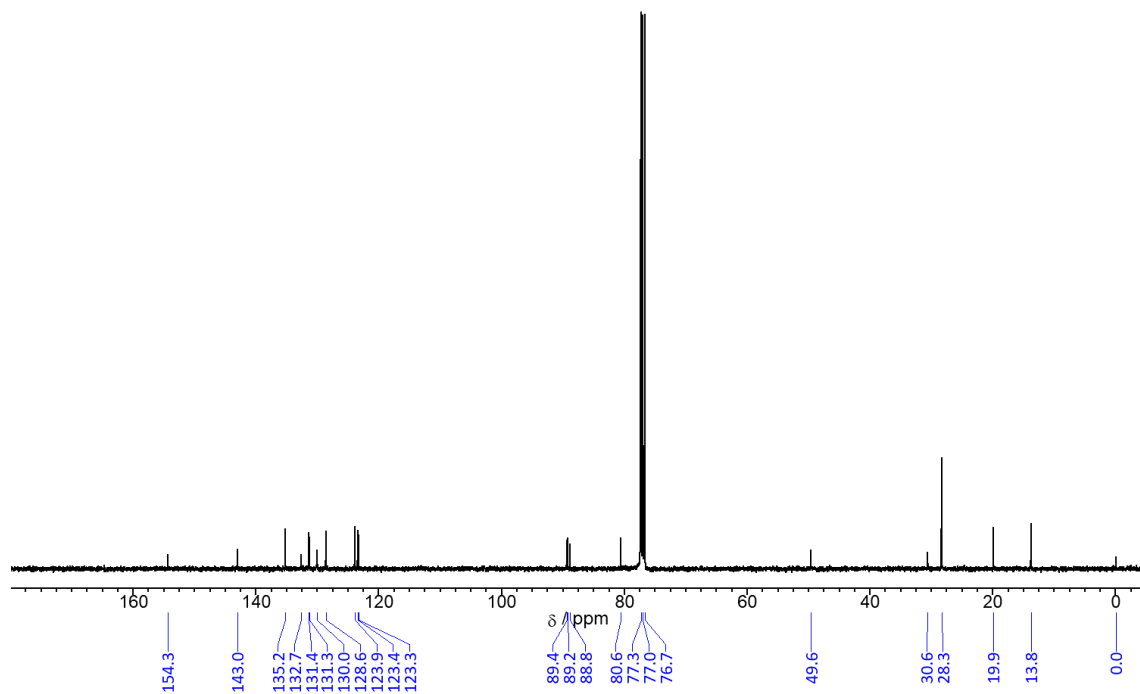

$^{13}\text{C}$  NMR (100 MHz) spectrum of **12**, measured in chloroform-*d* at room temperature.



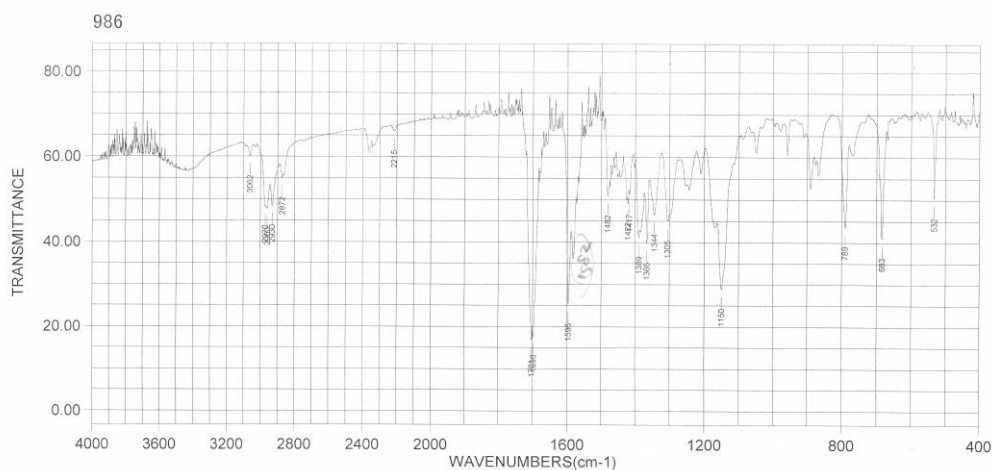

|          |           |         |       |         |       |
|----------|-----------|---------|-------|---------|-------|
| RESOL    | : 2 cm-1  | 3062.44 | 60.12 | 1422.26 | 49.19 |
| SCANS    | : 5       | 2970.84 | 48.33 | 1417.44 | 51.22 |
| AMP GAIN | : x1      | 2960.23 | 47.76 | 1389.48 | 41.19 |
| P. INT   | : 1 cm-1  | 2930.34 | 48.41 | 1366.34 | 39.81 |
| BEAM     | : single  | 2872.49 | 54.99 | 1344.16 | 46.55 |
| S. SPEED | : TGS     | 2215.84 | 66.11 | 1305.59 | 45.01 |
| M. DATE  | : 11/2/18 | 1701.89 | 16.74 | 1150.34 | 28.91 |
| F. NAME  | : 測定中のデータ | 1698.04 | 17.93 | 789.72  | 43.64 |
|          |           | 1596.79 | 25.30 | 683.65  | 40.97 |
|          |           | 1482.04 | 50.93 | 532.26  | 50.43 |

IR spectrum of **12**.

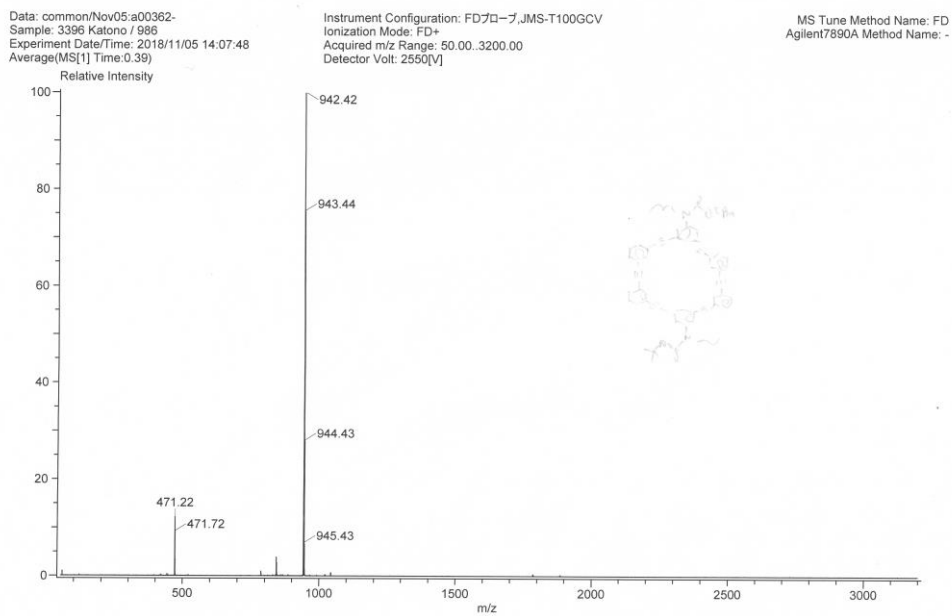

Mass spectrum (FD) of **12**.

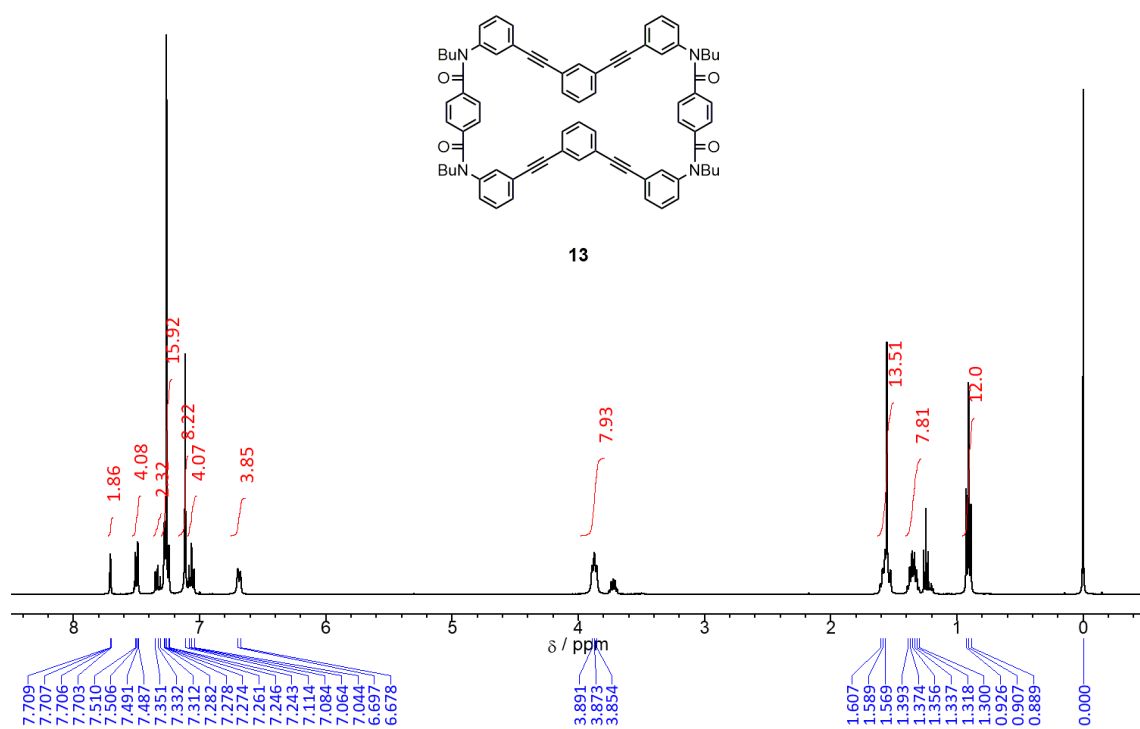

$^1\text{H}$  NMR (400 MHz) spectrum of **13** cont. ethanol, measured in chloroform-*d* at room temperature.

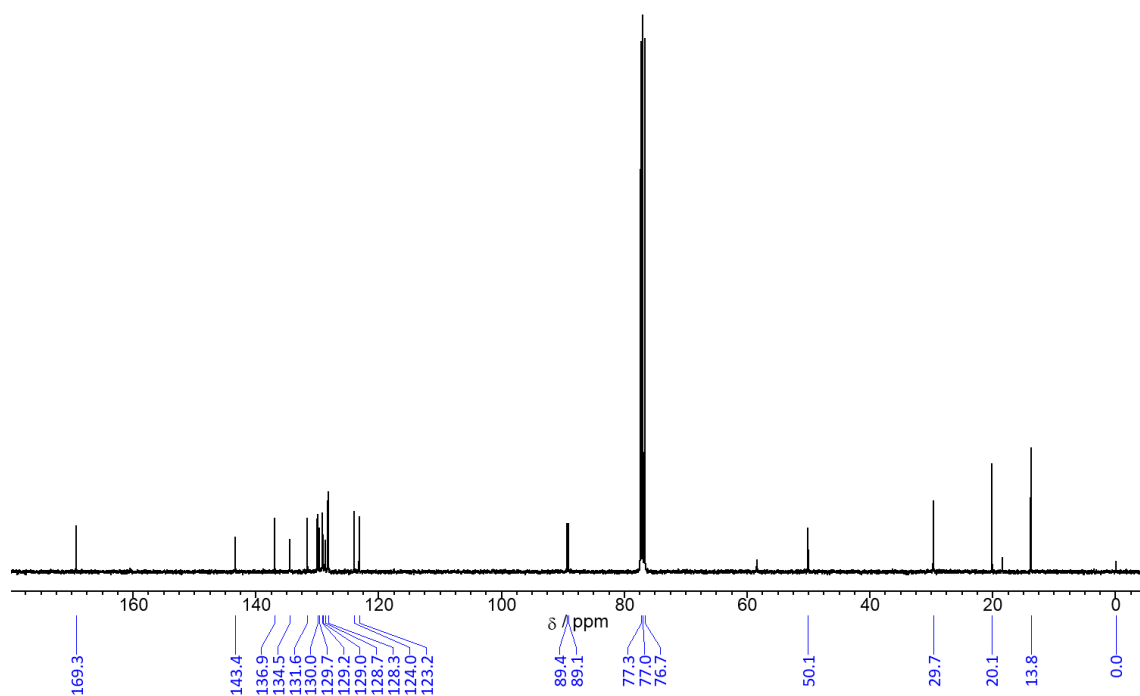

$^{13}\text{C}$  NMR (100 MHz) spectrum of **13** cont. ethanol, measured in chloroform-*d* at room temperature.

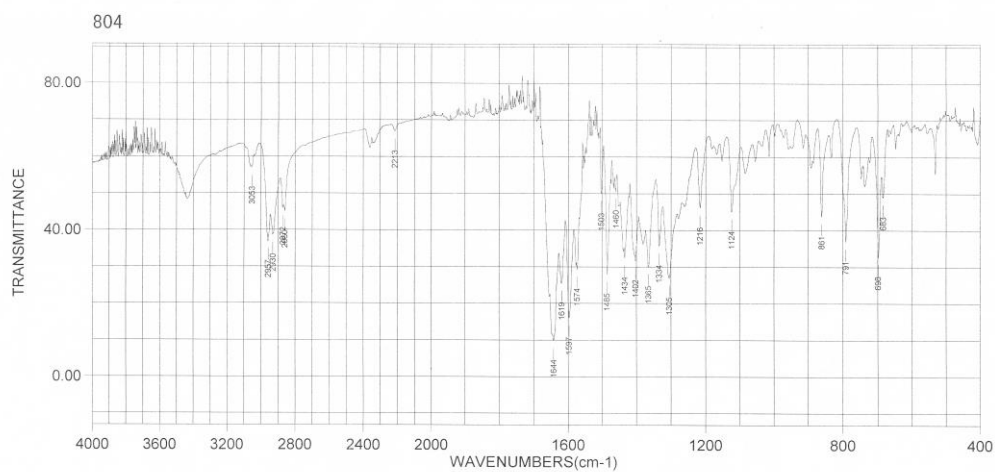

|          |           |         |       |         |       |        |       |
|----------|-----------|---------|-------|---------|-------|--------|-------|
| RESOL    | : 2 cm-1  | 3053.76 | 57.01 | 1503.26 | 50.01 | 861.07 | 43.90 |
| SCANS    | : 5       | 2957.34 | 37.01 | 1485.90 | 28.10 | 791.65 | 37.04 |
| AMP GAIN | : x1      | 2930.34 | 38.69 | 1460.83 | 50.72 | 698.11 | 32.82 |
| P. INT   | : 1 cm-1  | 2872.49 | 46.00 | 1434.80 | 32.57 | 683.65 | 49.04 |
| BEAM     | : single  | 2860.92 | 45.14 | 1402.98 | 31.84 |        |       |
| S. SPEED | : TGS     | 2213.91 | 66.96 | 1365.37 | 30.13 |        |       |
| M. DATE  | : 11/2/18 | 1644.04 | 9.90  | 1334.52 | 35.83 |        |       |
| F. NAME  | : 測定中のデータ | 1619.93 | 25.61 | 1305.59 | 27.01 |        |       |
|          |           | 1597.75 | 16.16 | 1216.88 | 46.21 |        |       |
|          |           | 1574.61 | 29.39 | 1124.31 | 45.17 |        |       |

IR spectrum of **13**.

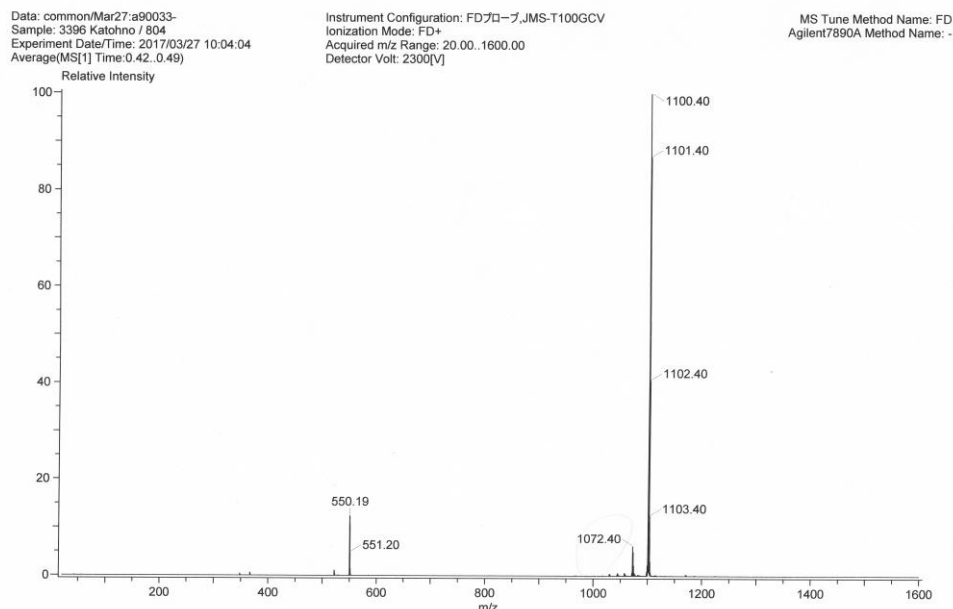

Mass spectrum (FD) of **13**.

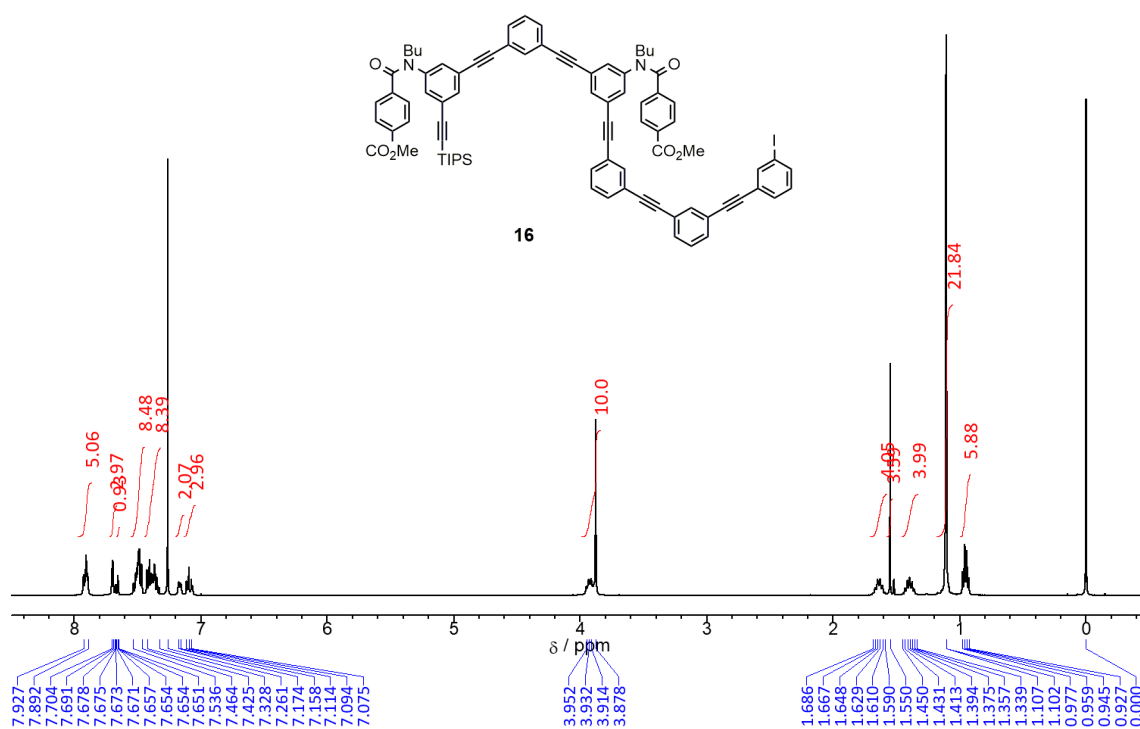

<sup>1</sup>H NMR (400 MHz) spectrum of **16**, measured in chloroform-*d* at room temperature.

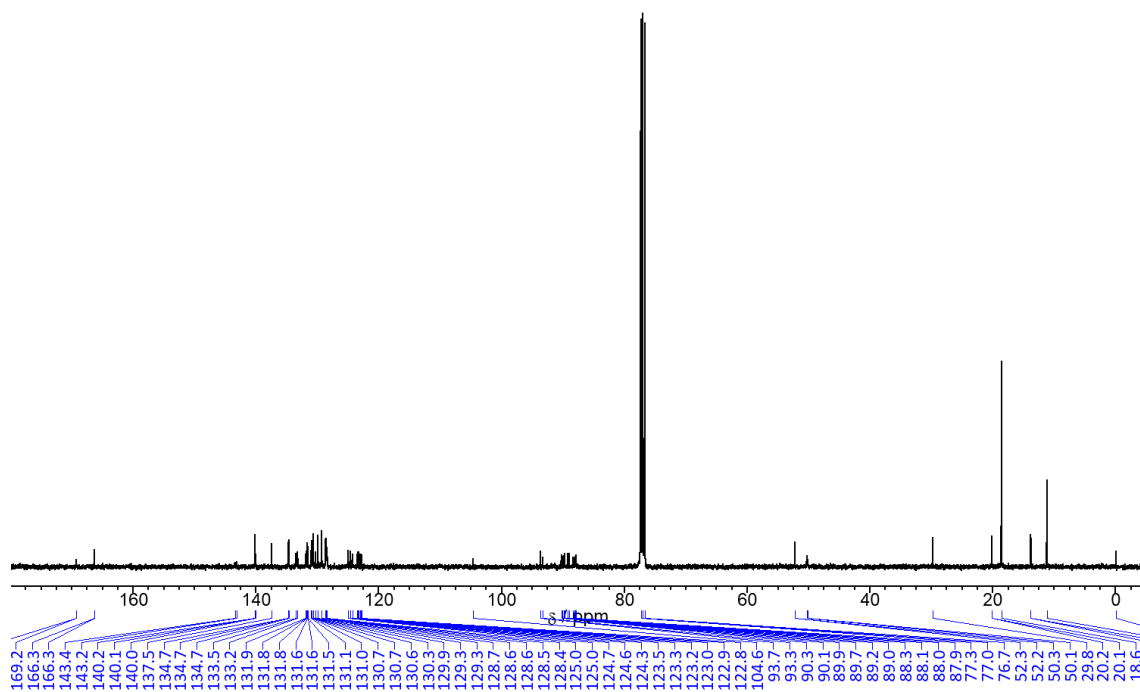

<sup>13</sup>C NMR (100 MHz) spectrum of **16**, measured in chloroform-*d* at room temperature.

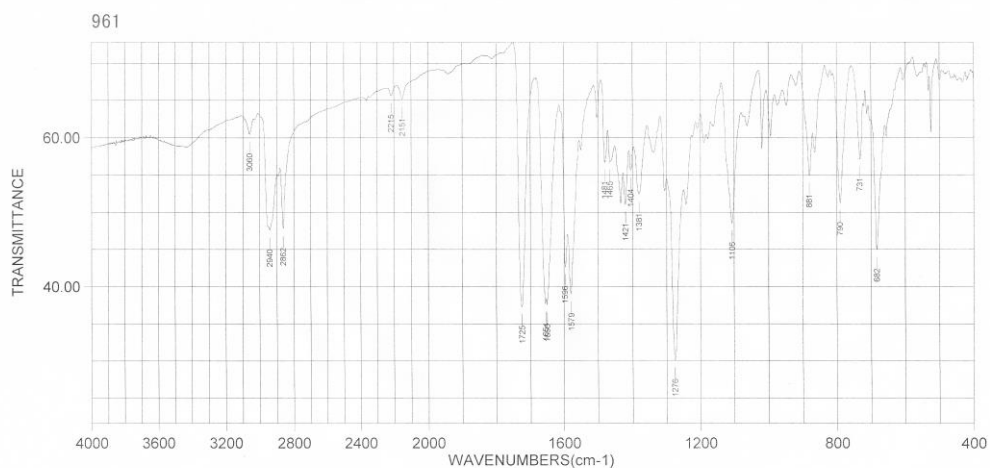

|          |           |         |       |         |       |        |       |
|----------|-----------|---------|-------|---------|-------|--------|-------|
| RESOL    | : 2 cm-1  | 3060.51 | 60.52 | 1481.08 | 56.78 | 682.69 | 45.03 |
| SCANS    | : 5       | 2940.95 | 47.66 | 1465.65 | 56.77 |        |       |
| AMPGAIN  | : x1      | 2862.84 | 47.87 | 1421.30 | 51.13 |        |       |
| P. INT   | : 1 cm-1  | 2215.84 | 65.70 | 1404.91 | 55.71 |        |       |
| BEAM     | : single  | 2151.23 | 65.22 | 1381.76 | 52.49 |        |       |
| S. SPEED | : TGS     | 1725.03 | 37.33 | 1276.66 | 30.14 |        |       |
| M. DATE  | : 11/2/18 | 1654.64 | 37.70 | 1106.95 | 48.61 |        |       |
| F. NAME  | : 測定中のデータ | 1650.79 | 37.55 | 881.32  | 55.03 |        |       |
|          |           | 1596.79 | 42.71 | 790.68  | 51.30 |        |       |
|          |           | 1579.43 | 39.04 | 731.86  | 57.24 |        |       |

IR spectrum of 16.

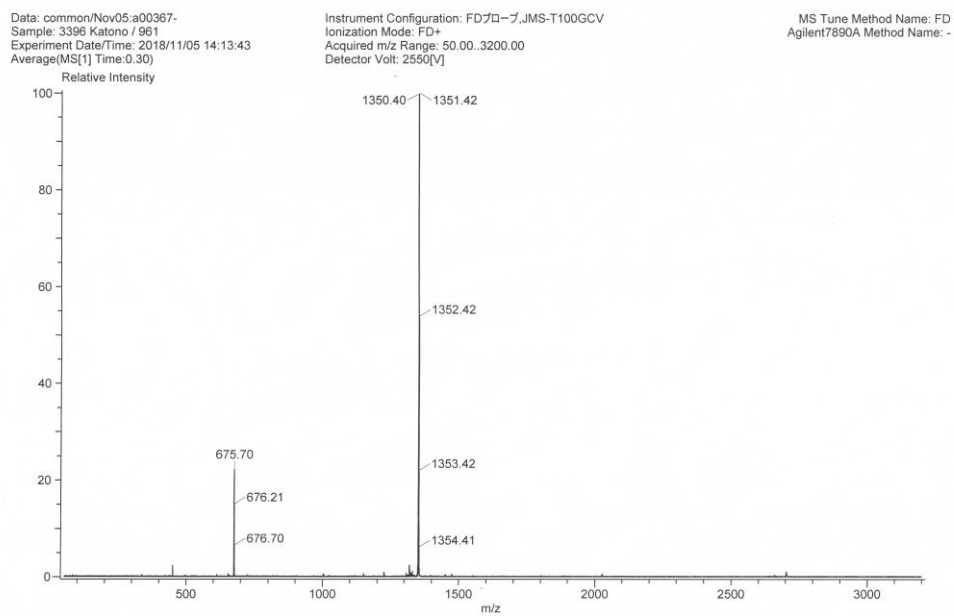

Mass spectrum (FD) of 16.

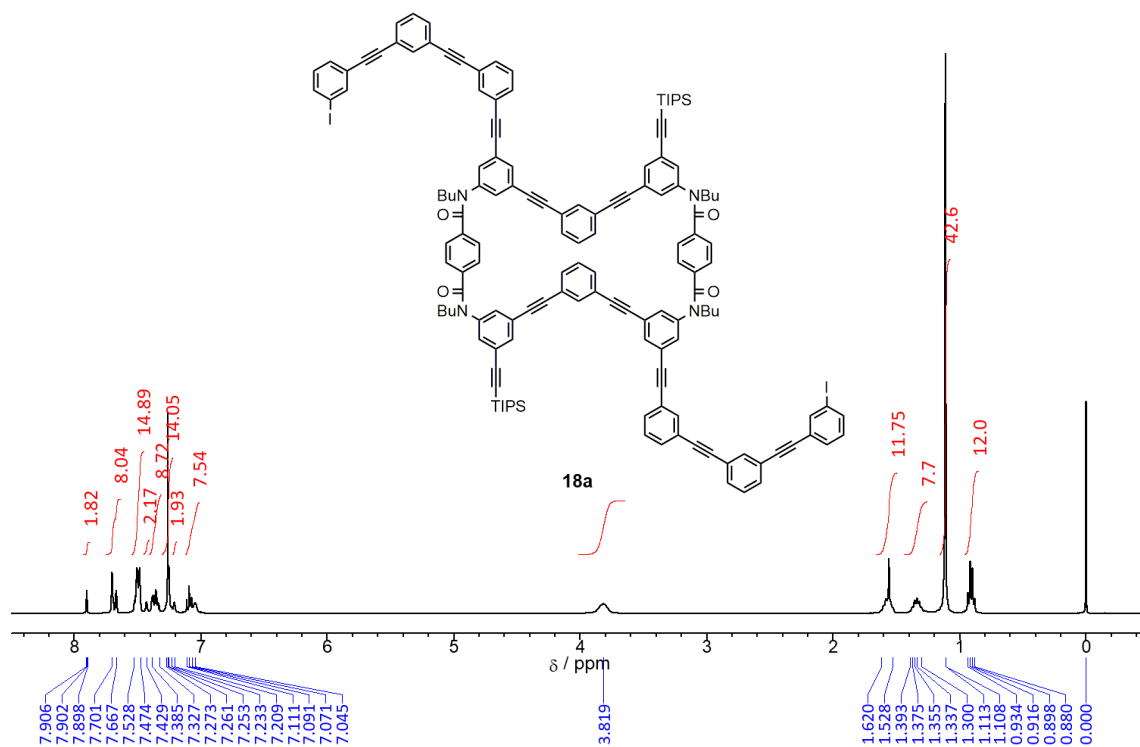

<sup>1</sup>H NMR (400 MHz) spectrum of **18a**, measured in chloroform-*d* at room temperature.

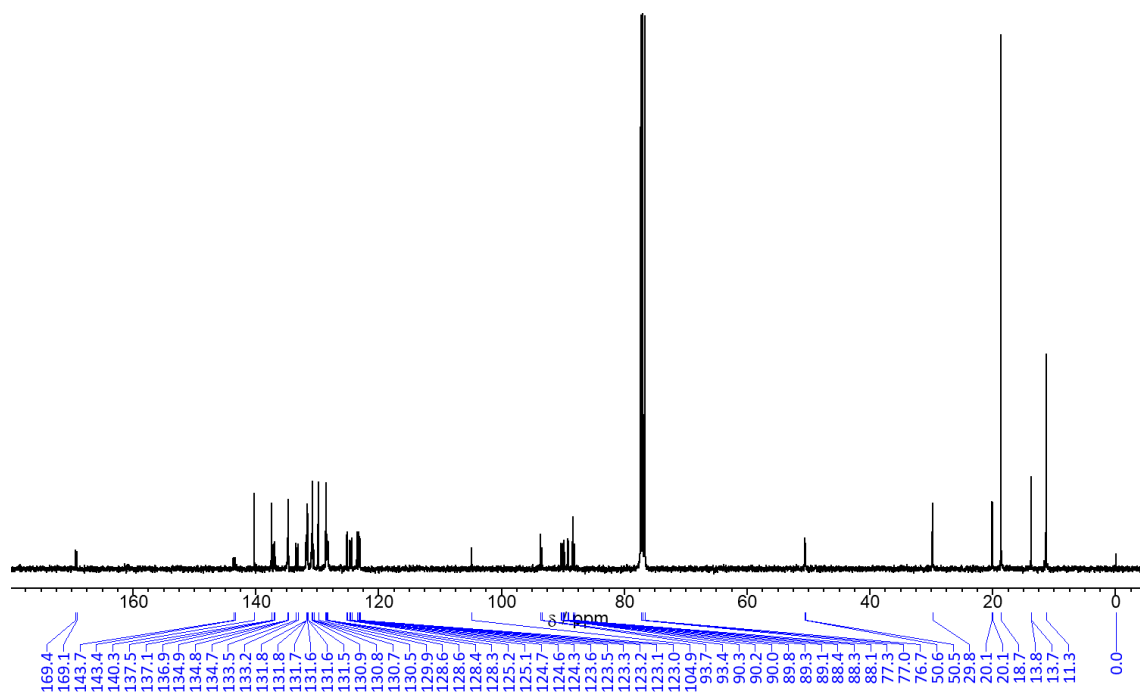

<sup>13</sup>C NMR (100 MHz) spectrum of **18a**, measured in chloroform-*d* at 313 K.

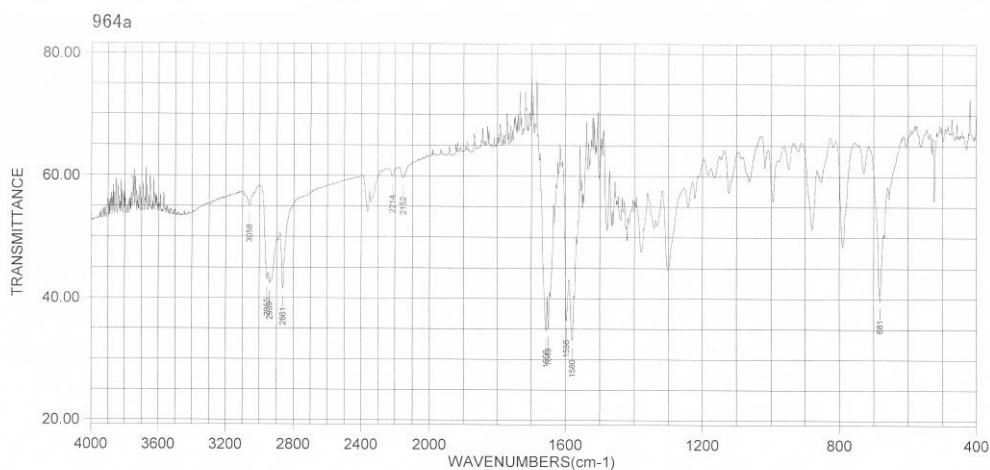

|          |                      |         |       |        |       |
|----------|----------------------|---------|-------|--------|-------|
| RESOL    | : 2 cm <sup>-1</sup> | 3058.59 | 55.16 | 681.72 | 39.70 |
| SCANS    | : 5                  | 2955.41 | 43.06 |        |       |
| AMPGAIN  | : x1                 | 2939.02 | 42.42 |        |       |
| P. INT   | : 1 cm <sup>-1</sup> | 2861.88 | 41.55 |        |       |
| BEAM     | : single             | 2214.87 | 59.94 |        |       |
| S. SPEED | : TGS                | 2152.20 | 59.71 |        |       |
| M. DATE  | : 11/2/18            | 1656.57 | 34.77 |        |       |
| F. NAME  | : 測定中のデータ            | 1649.82 | 34.99 |        |       |
|          |                      | 1596.79 | 36.35 |        |       |
|          |                      | 1580.40 | 33.13 |        |       |

IR spectrum of **18a**.

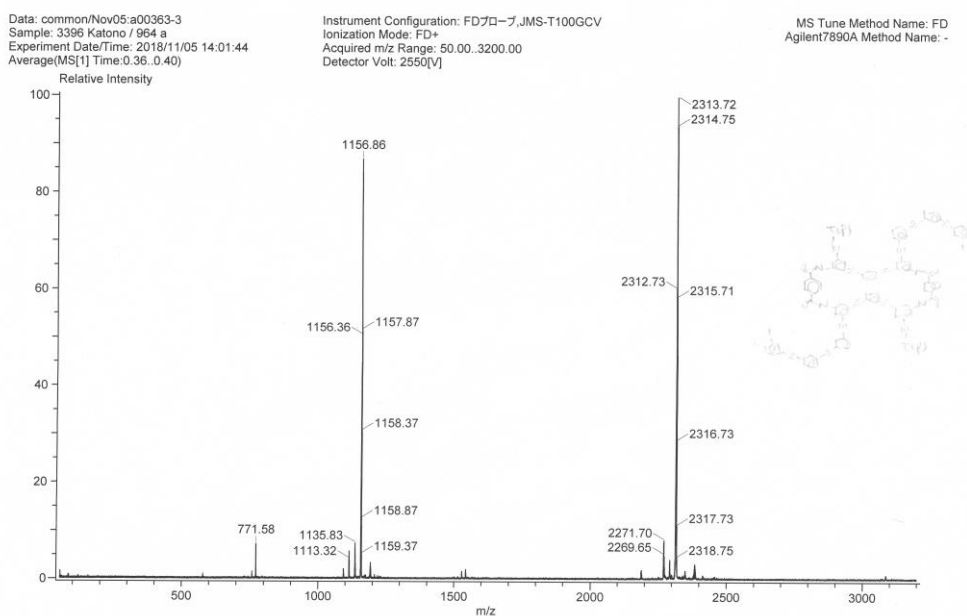

Mass spectrum (FD) of **18a**.

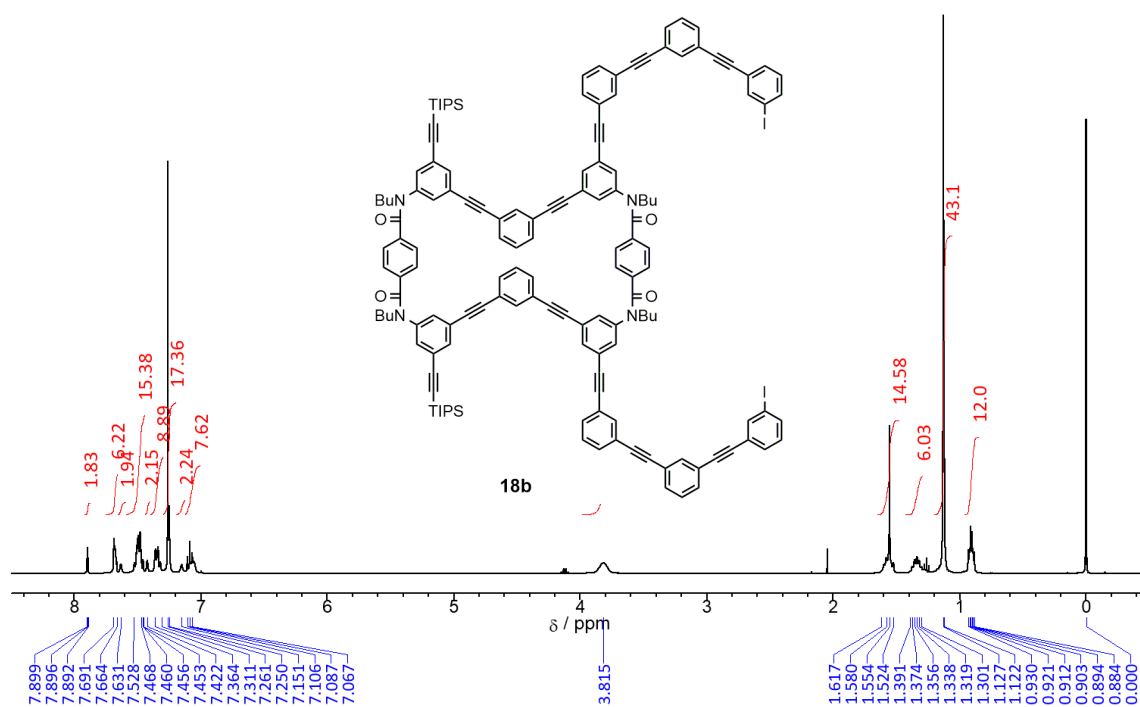

<sup>1</sup>H NMR (400 MHz) spectrum of **18b** cont. residual solvent (ethyl acetate), measured in chloroform-*d* at room temperature.

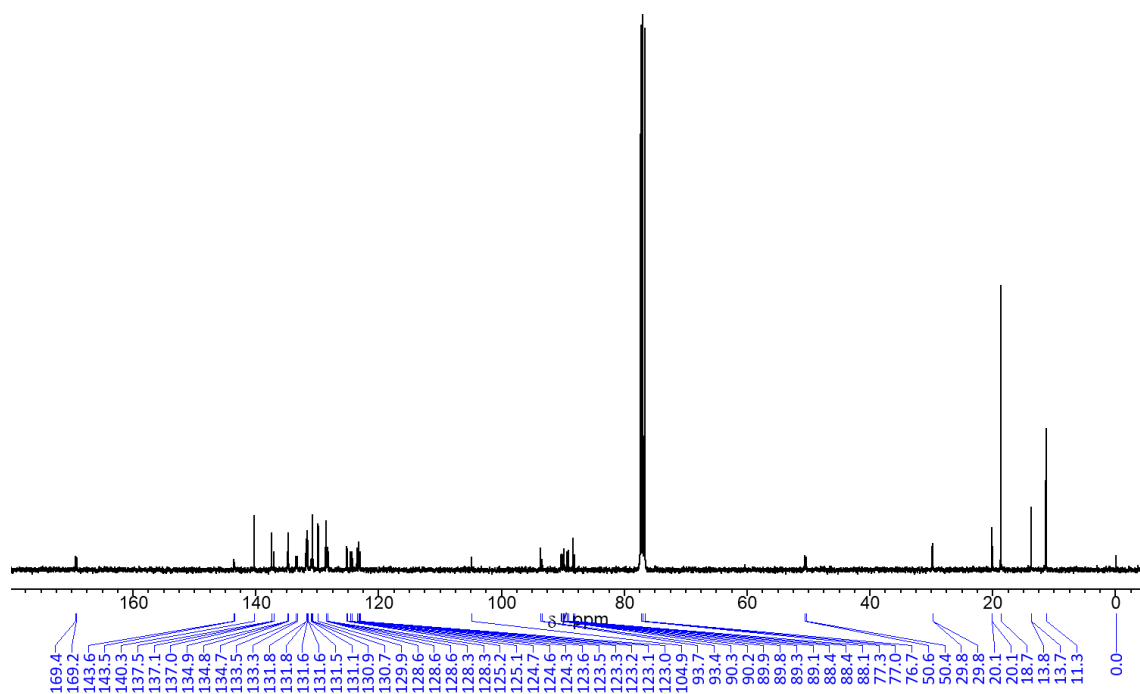

<sup>13</sup>C NMR (100 MHz) spectrum of **18b**, measured in chloroform-*d* at 313 K.



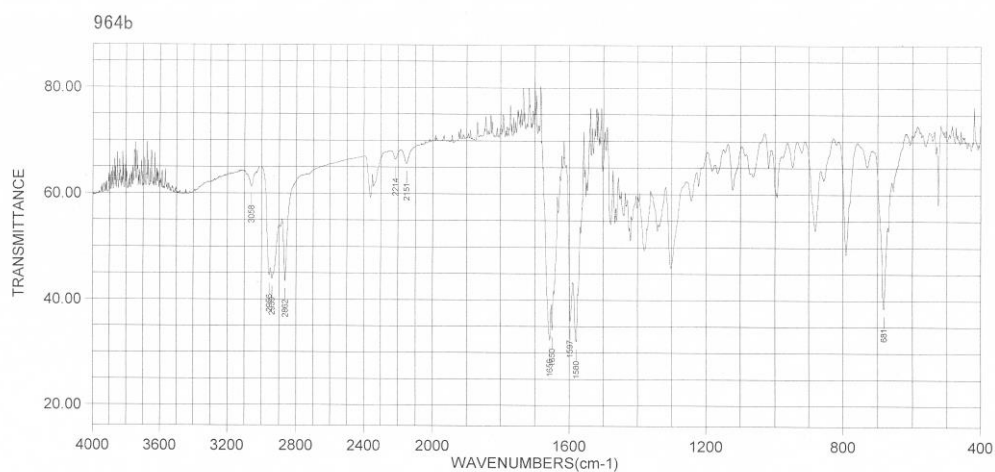

|          |           |         |       |        |       |
|----------|-----------|---------|-------|--------|-------|
| RESOL    | : 2 cm-1  | 3058.59 | 61.36 | 681.72 | 38.48 |
| SCANS    | : 5       | 2956.38 | 44.51 |        |       |
| AMP GAIN | : x1      | 2939.98 | 43.95 |        |       |
| P. INT   | : 1 cm-1  | 2862.84 | 43.46 |        |       |
| BEAM     | : single  | 2214.87 | 66.52 |        |       |
| S. SPEED | : TGS     | 2151.23 | 65.70 |        |       |
| M. DATE  | : 11/2/18 | 1656.57 | 32.45 |        |       |
| F. NAME  | : 測定中のデータ | 1650.79 | 34.39 |        |       |
|          |           | 1597.75 | 36.08 |        |       |
|          |           | 1580.40 | 32.14 |        |       |

IR spectrum of **18b**.

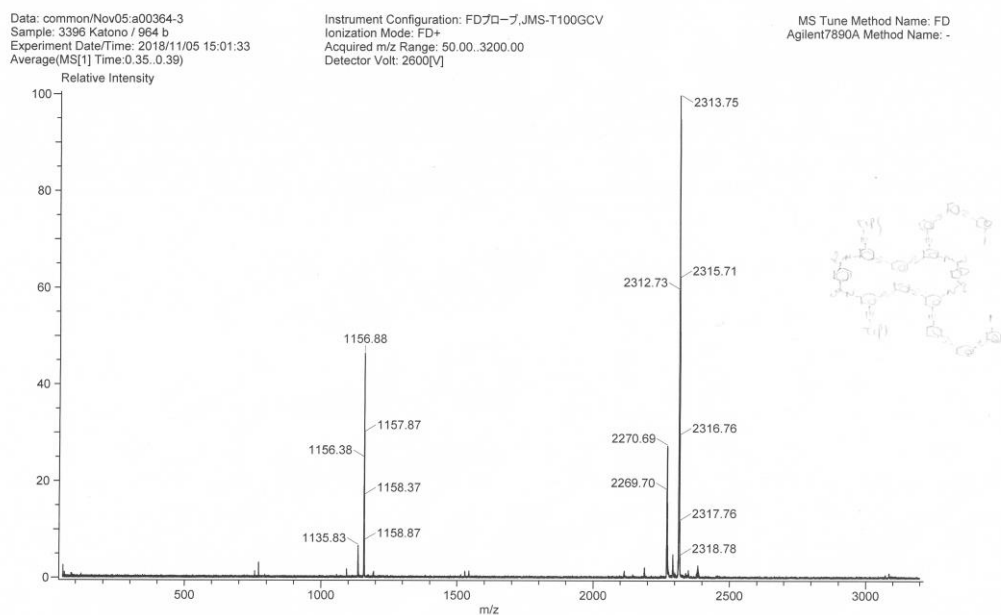

Mass spectrum (FD) of **18b**.

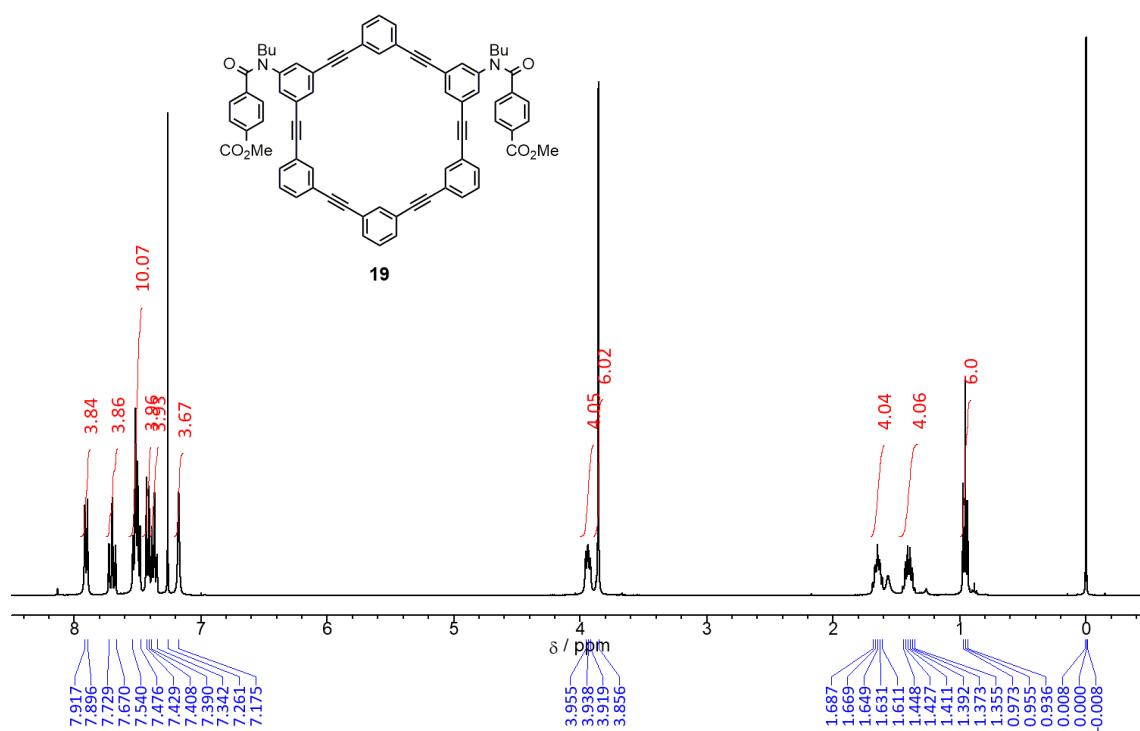

<sup>1</sup>H NMR (400 MHz) spectrum of **19**, measured in chloroform-*d* at room temperature.

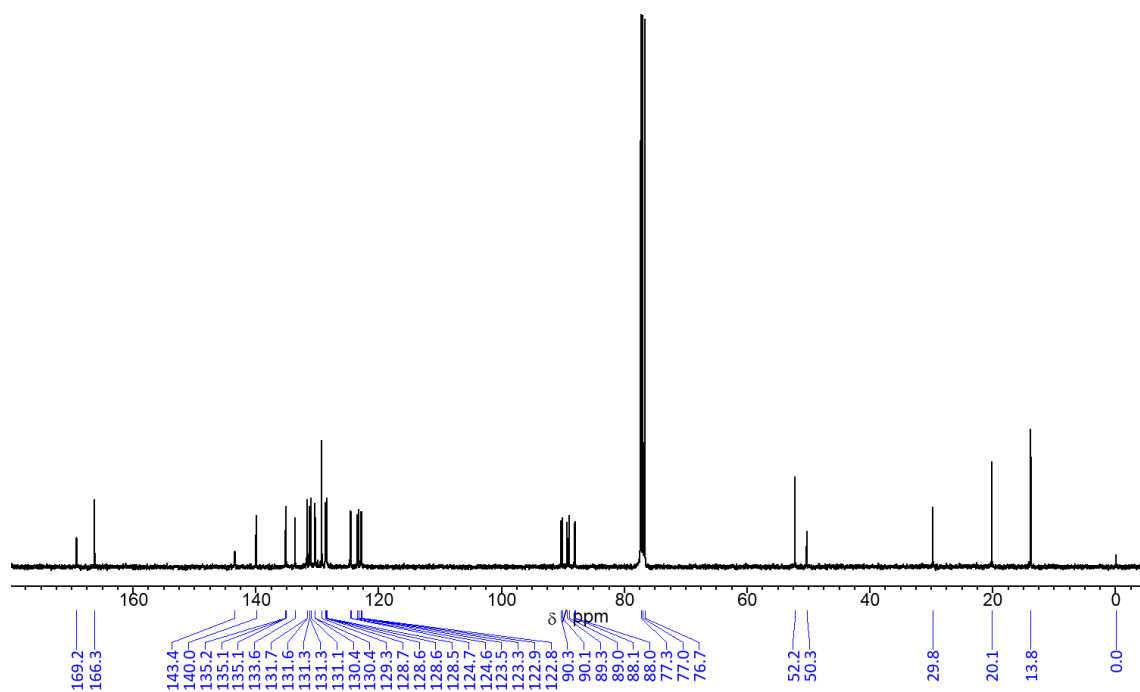

<sup>13</sup>C NMR (100 MHz) spectrum of **19**, measured in chloroform-*d* at room temperature.

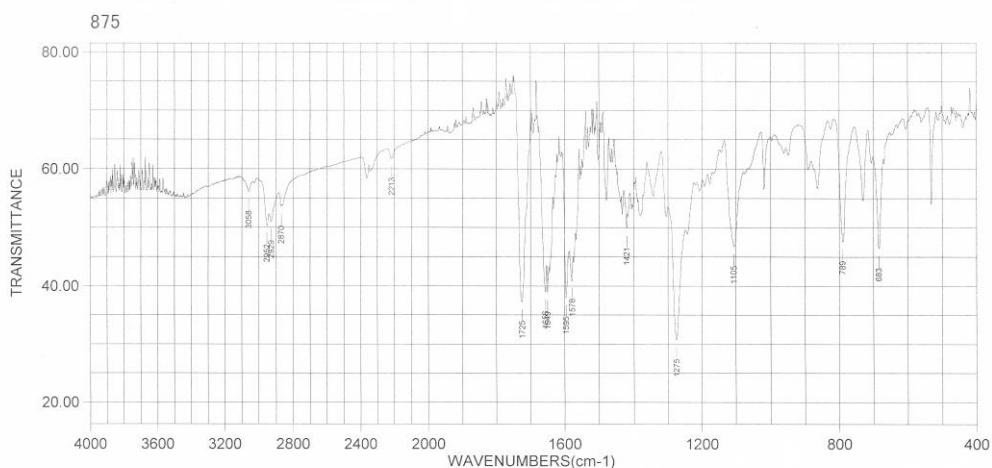

|          |           |      |         |       |         |       |
|----------|-----------|------|---------|-------|---------|-------|
| RESOL    | : 2       | cm-1 | 3058.59 | 56.15 | 1421.30 | 49.90 |
| SCANS    | : 5       |      | 2952.52 | 50.39 | 1275.70 | 30.79 |
| AMP GAIN | : x1      |      | 2929.38 | 51.06 | 1105.99 | 46.76 |
| P. INT   | : 1       | cm-1 | 2870.56 | 53.57 | 789.72  | 47.59 |
| BEAM     | : single  |      | 2213.91 | 61.81 | 683.65  | 46.45 |
| S. SPEED | : TGS     |      | 1725.03 | 37.30 |         |       |
| M. DATE  | : 11/2/18 |      | 1656.57 | 39.01 |         |       |
| F. NAME  | : 測定中のデータ |      | 1649.82 | 38.88 |         |       |
|          |           |      | 1595.83 | 38.01 |         |       |
|          |           |      | 1578.47 | 41.07 |         |       |

IR spectrum of 19.

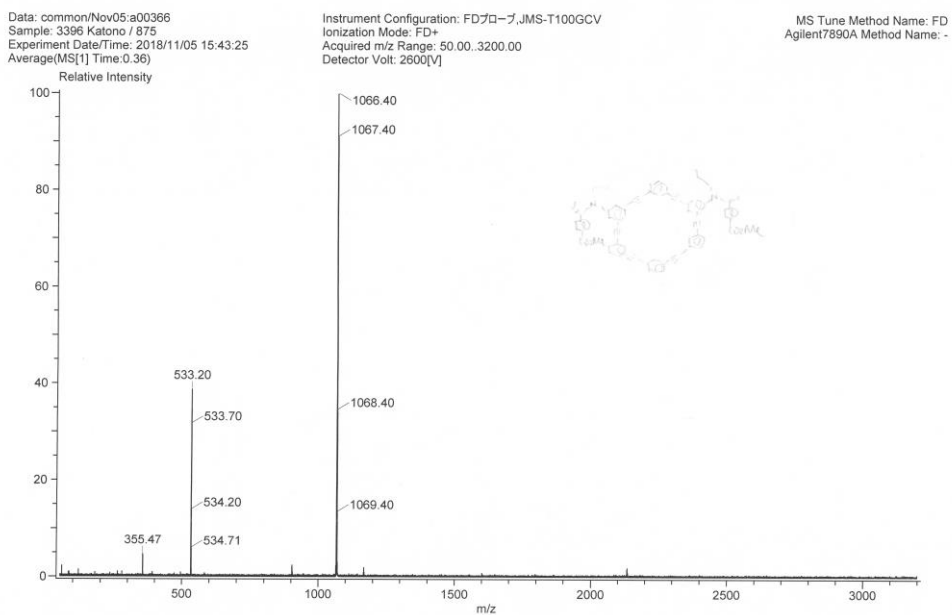

Mass spectrum (FD) of 19.

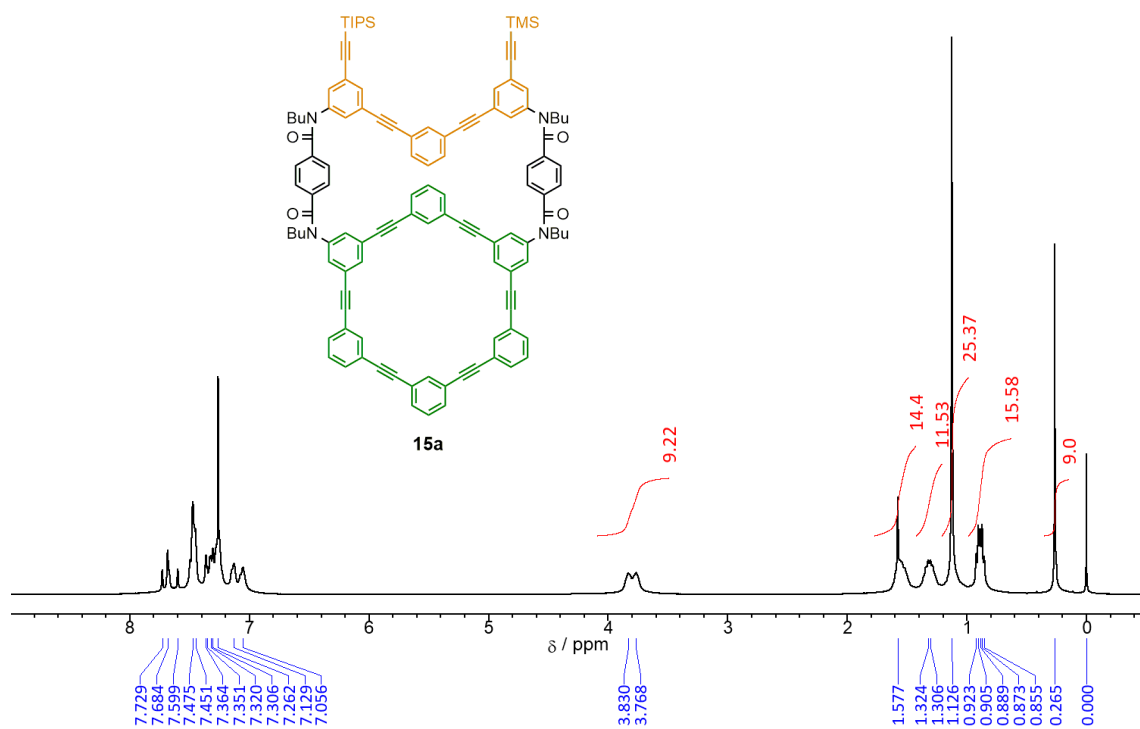

$^1\text{H}$  NMR (400 MHz) spectrum of **15a**, measured in chloroform-*d* at room temperature.

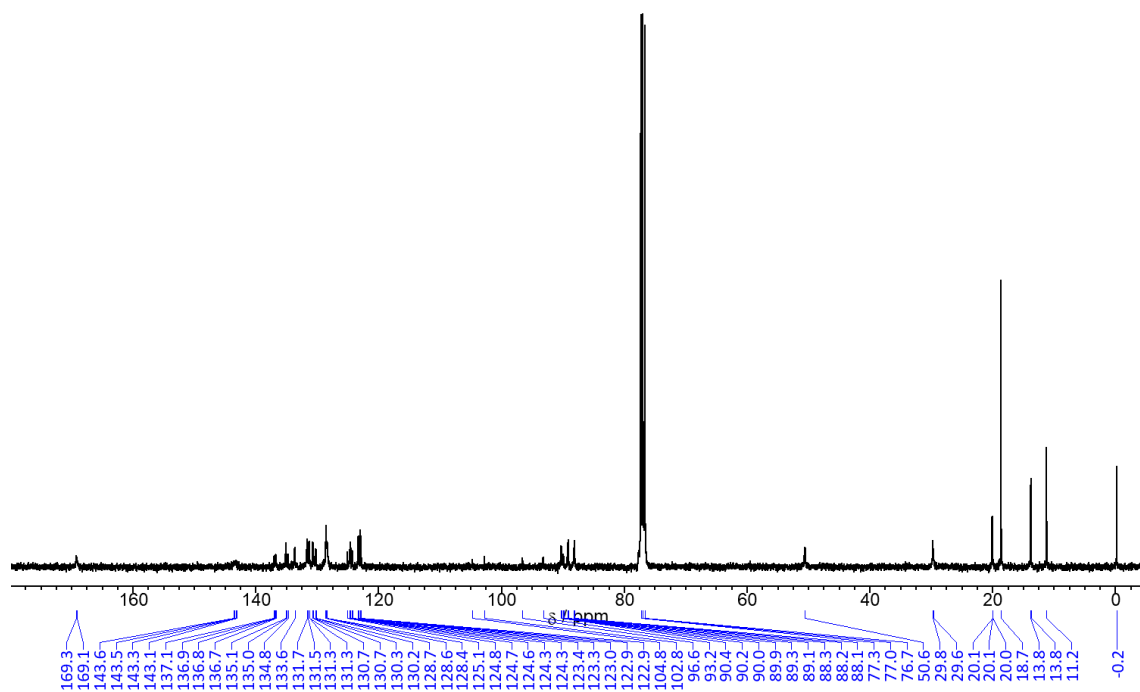

$^{13}\text{C}$  NMR (100 MHz) spectrum of **15a**, measured in chloroform-*d* at room temperature.

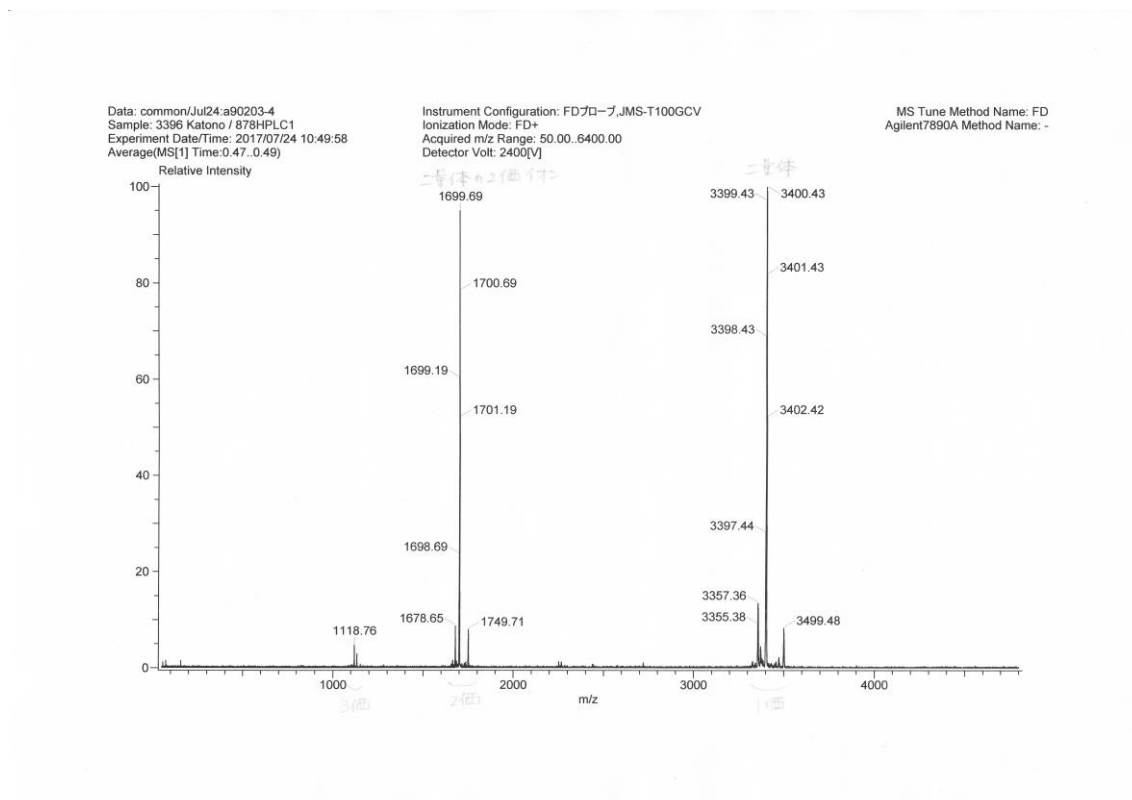

Mass spectrum (FD) of **15a**.

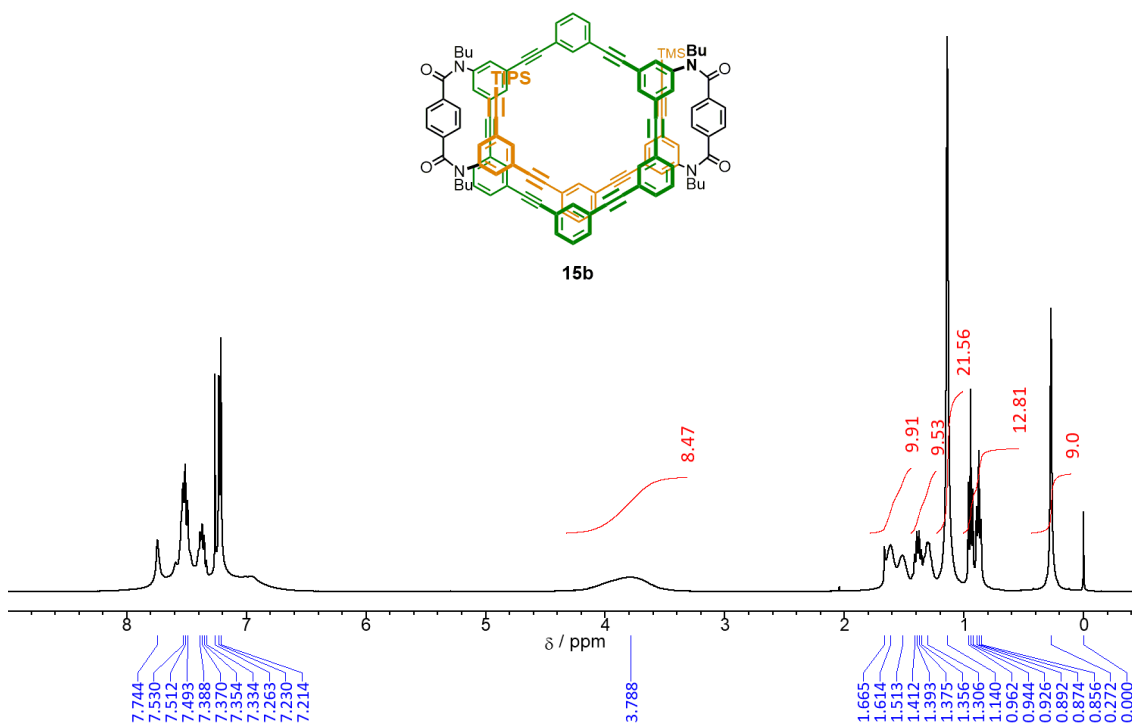

$^1\text{H}$  NMR (400 MHz) spectrum of **15b**, measured in chloroform-*d* at room temperature.

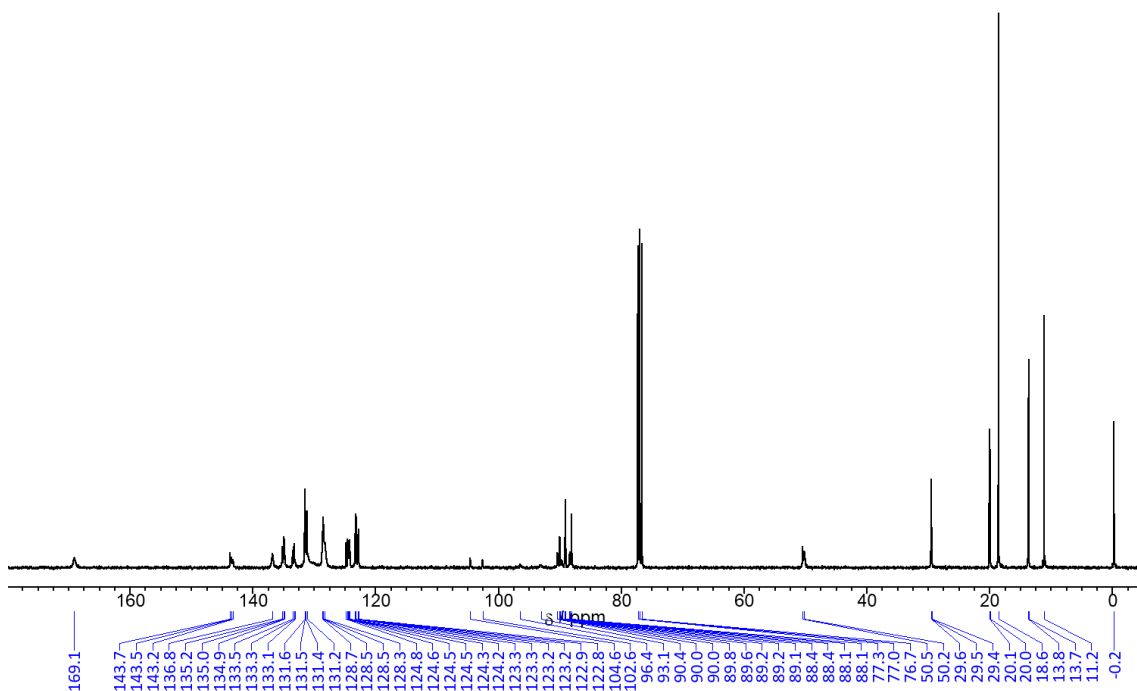

$^{13}\text{C}$  NMR (100 MHz) spectrum of **15b**, measured in chloroform-*d* at room temperature.

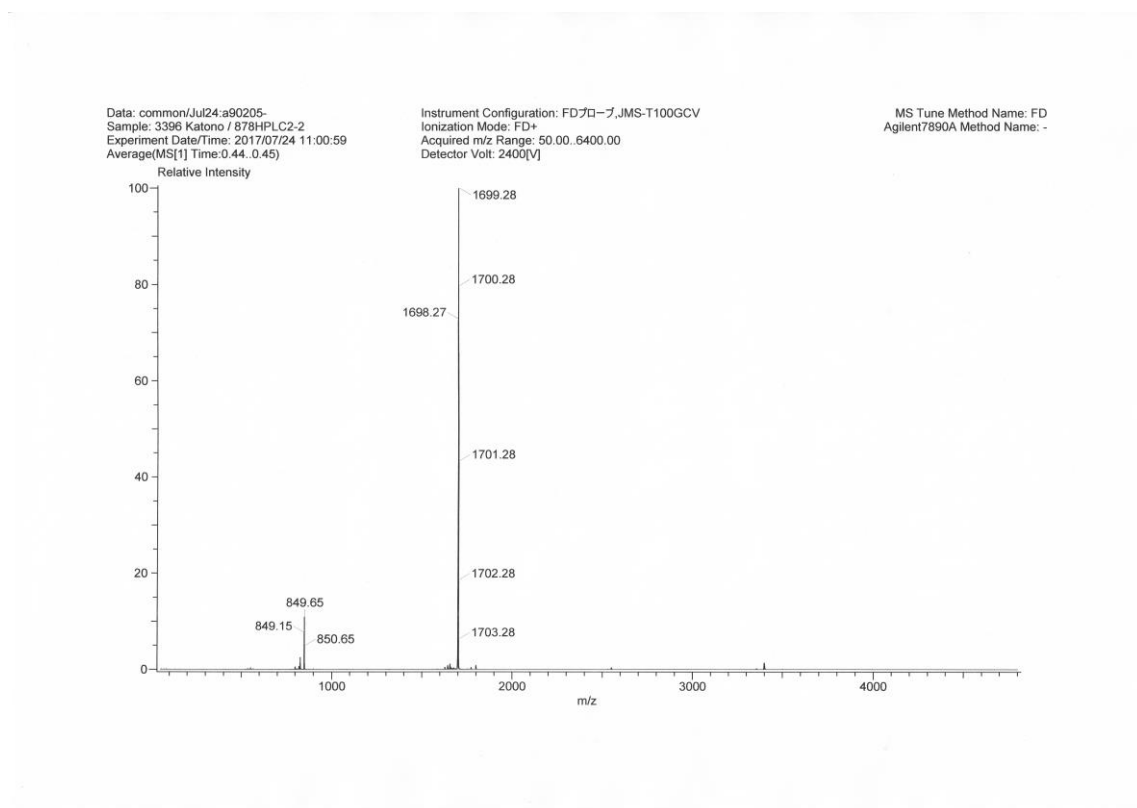

Mass spectrum (FD) of **15b**.

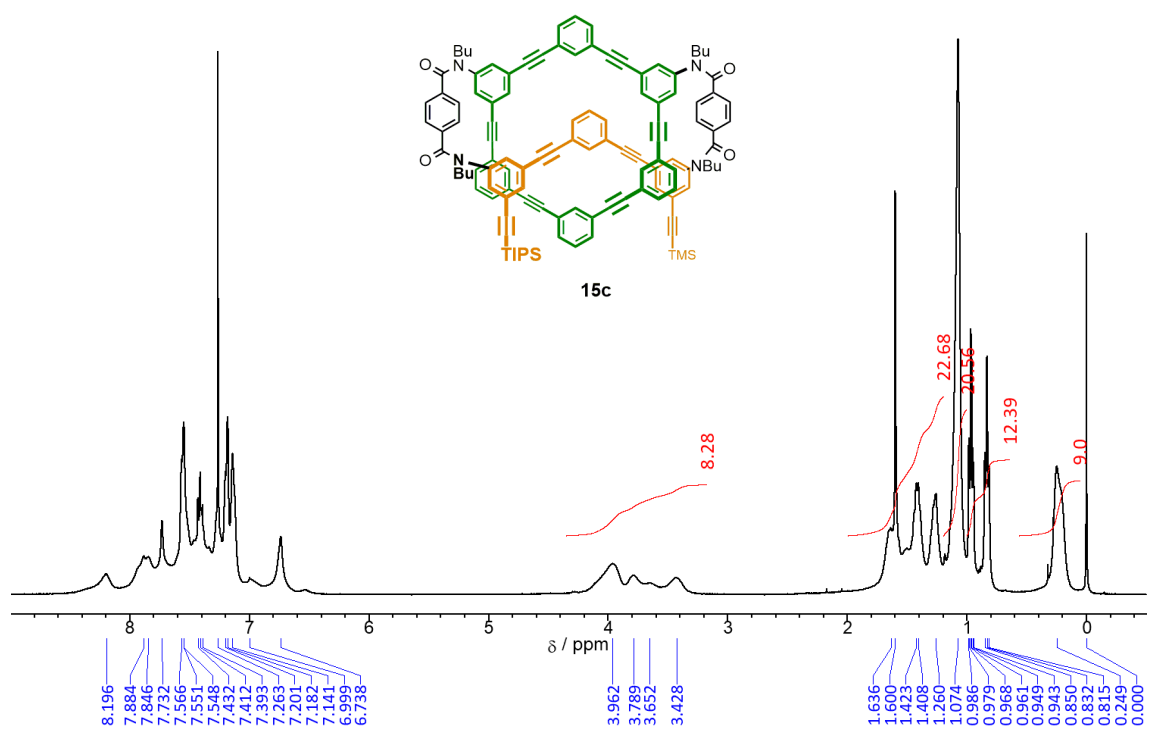

<sup>1</sup>H NMR (400 MHz) spectrum of **15c**, measured in chloroform-*d* at room temperature.

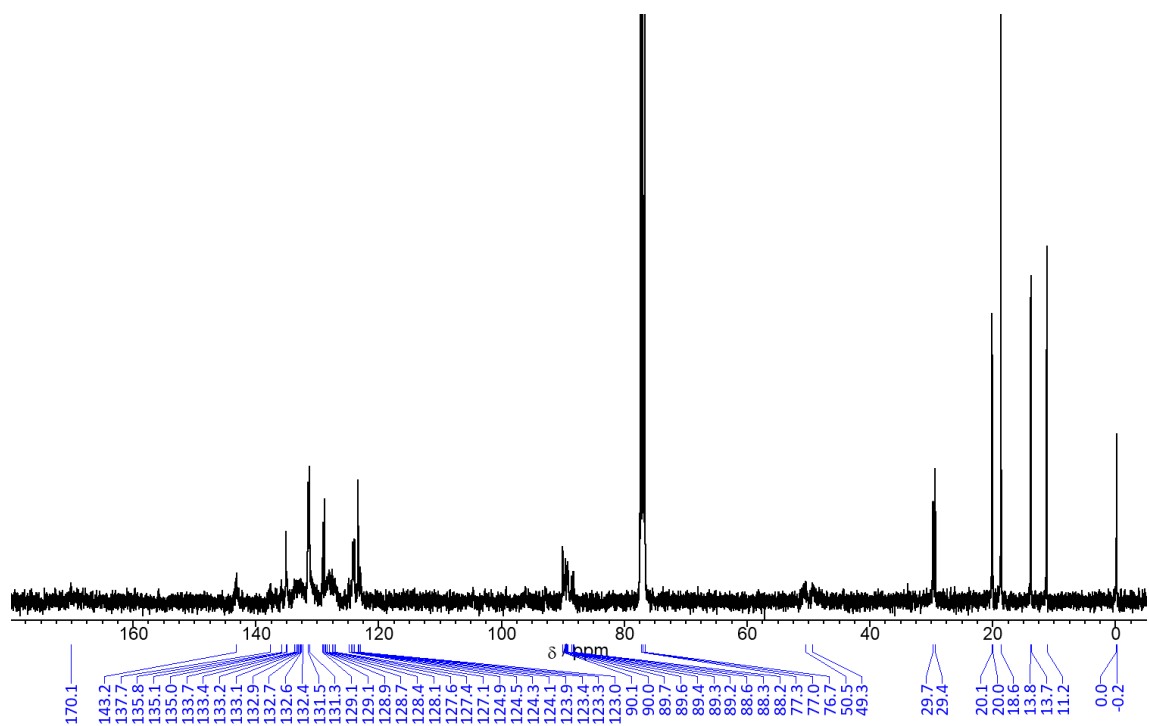

<sup>13</sup>C NMR (100 MHz) spectrum of **15c**, measured in chloroform-*d* at room temperature.

Data: common/Jul24:s90204-  
Sample: 3396 Katono / 878HPLC2-1  
Experiment Date/Time: 2017/07/24 10:54:58  
Average(MS[1] Time:0.46..0.48)

Instrument Configuration: FDプローブ,JMS-T100GCV  
Ionization Mode: FD+  
Acquired m/z Range: 50.00..6400.00  
Detector Volt: 2400[V]

MS Tune Method Name: FD  
Agilent7890A Method Name: -

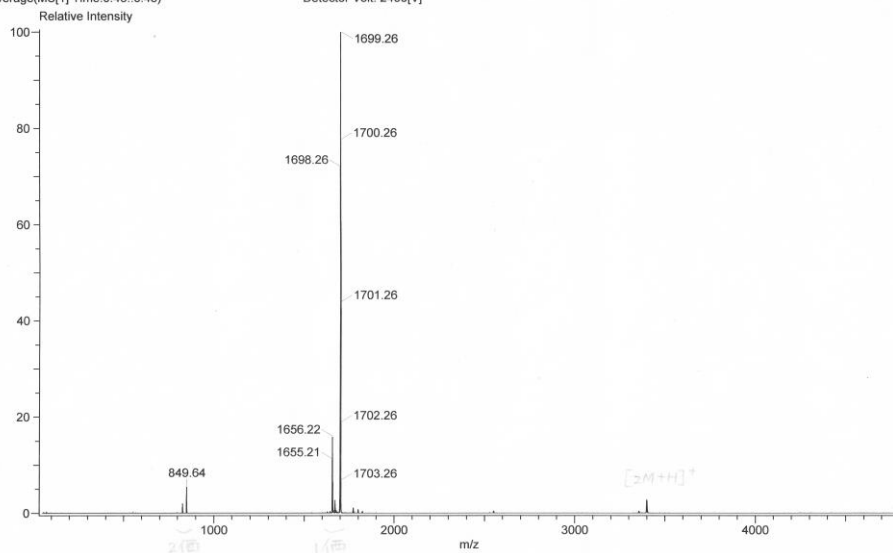

Mass spectrum (FD) of **15c**.



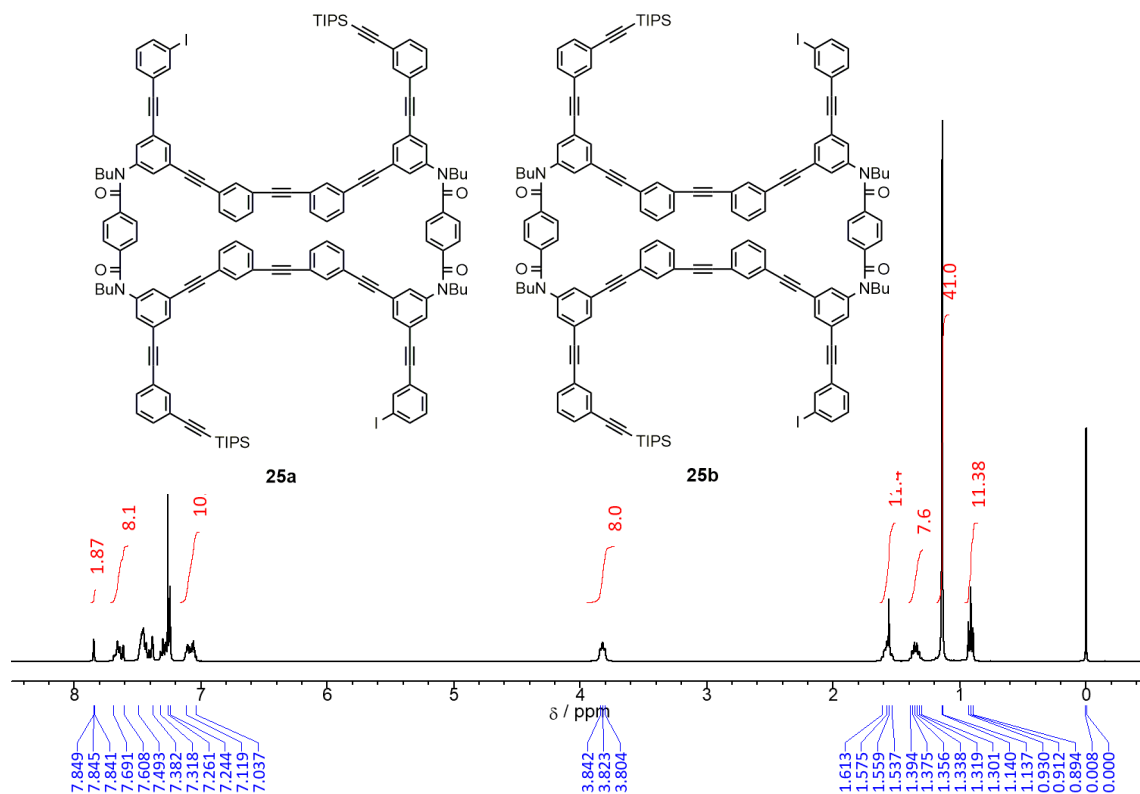

$^1\text{H}$  NMR (400 MHz) spectrum of a mixture of **25a** and **25b**, measured in chloroform-*d* at room temperature.

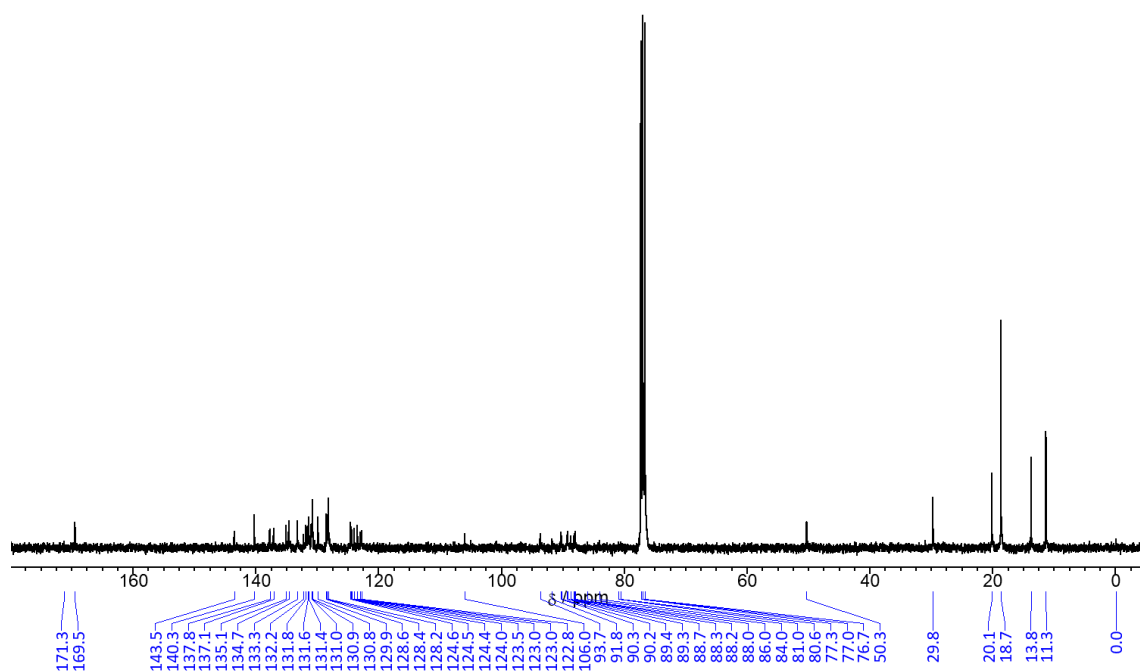

$^{13}\text{C}$  NMR (100 MHz) spectrum of a mixture of **25a** and **25b**, measured in chloroform-*d* at 308 K.

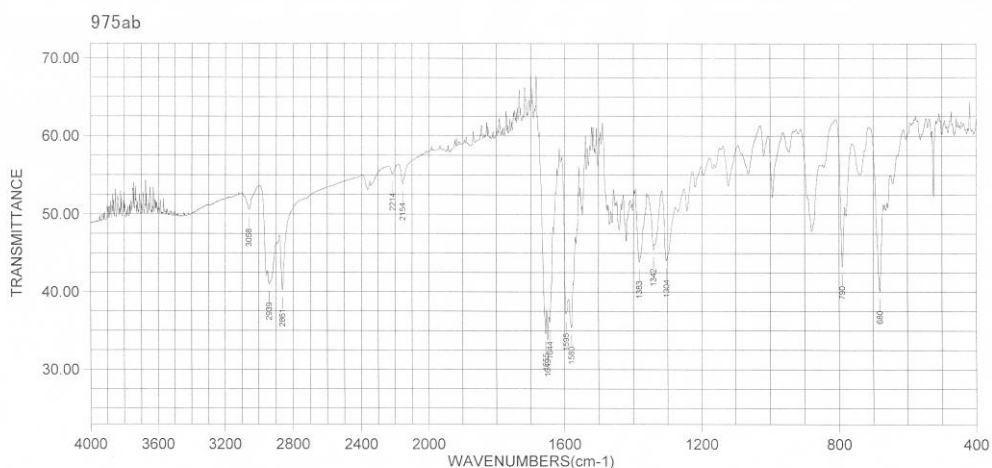

|          |           |         |         |         |         |       |
|----------|-----------|---------|---------|---------|---------|-------|
| RESOL    | : 2       | cm-1    | 3058.59 | 50.58   | 1383.69 | 43.92 |
| SCANS    | : 5       | 2939.02 | 41.06   | 1342.23 | 45.46   |       |
| AMPGAIN  | : x1      | 2861.88 | 40.26   | 1304.62 | 44.08   |       |
| P. INT   | : 1       | cm-1    | 2214.87 | 55.15   | 790.68  | 43.29 |
| BEAM     | : single  | 2154.12 | 53.87   | 680.76  | 40.09   |       |
| S. SPEED | : TGS     | 1655.61 | 34.58   |         |         |       |
| M. DATE  | : 11/2/18 | 1649.82 | 33.84   |         |         |       |
| F. NAME  | : 測定中のデータ | 1644.04 | 36.08   |         |         |       |
|          |           | 1595.83 | 37.17   |         |         |       |
|          |           | 1580.40 | 35.44   |         |         |       |

IR spectrum of a mixture of **25a** and **25b**.

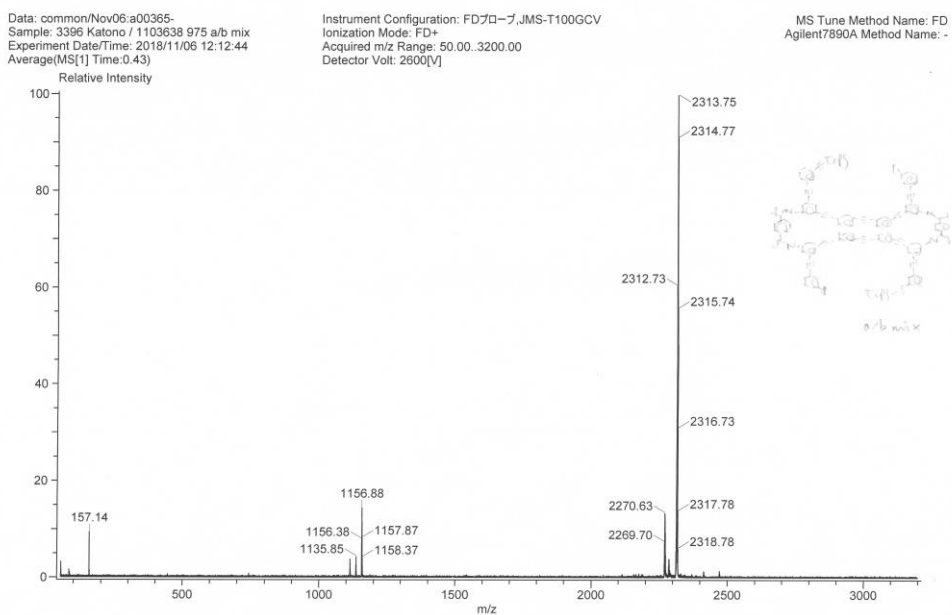

Mass spectrum (FD) of a mixture of **25a** and **25b**.

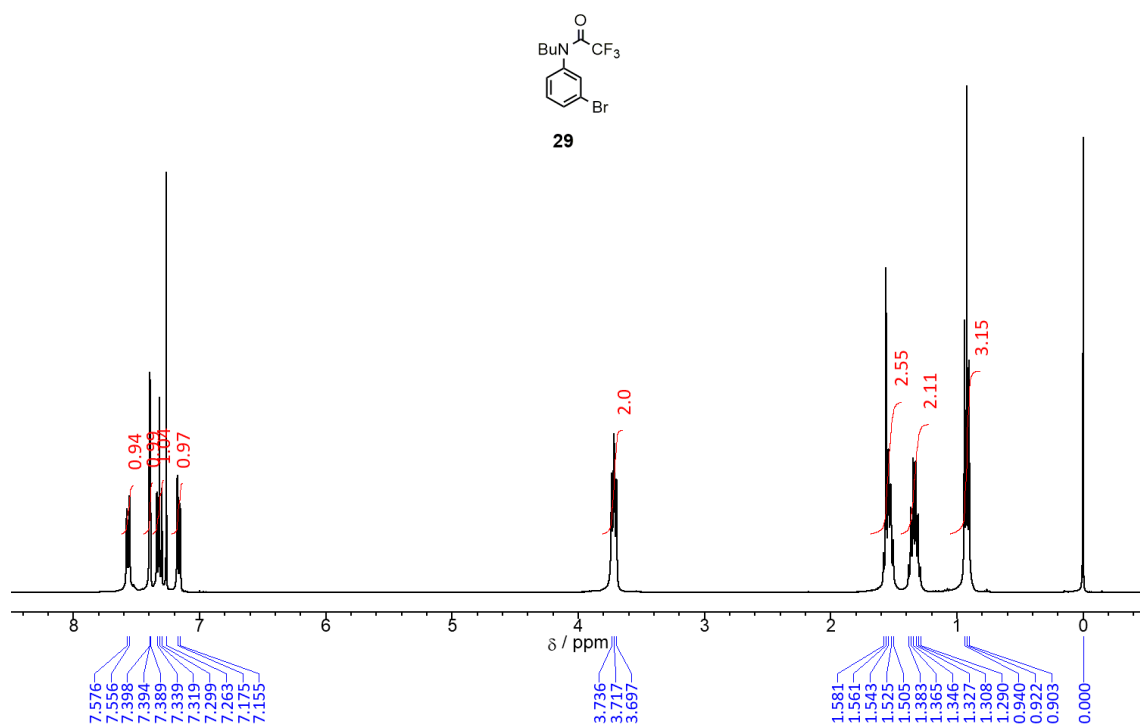

$^1\text{H}$  NMR (400 MHz) spectrum of **29**, measured in chloroform-*d* at room temperature.

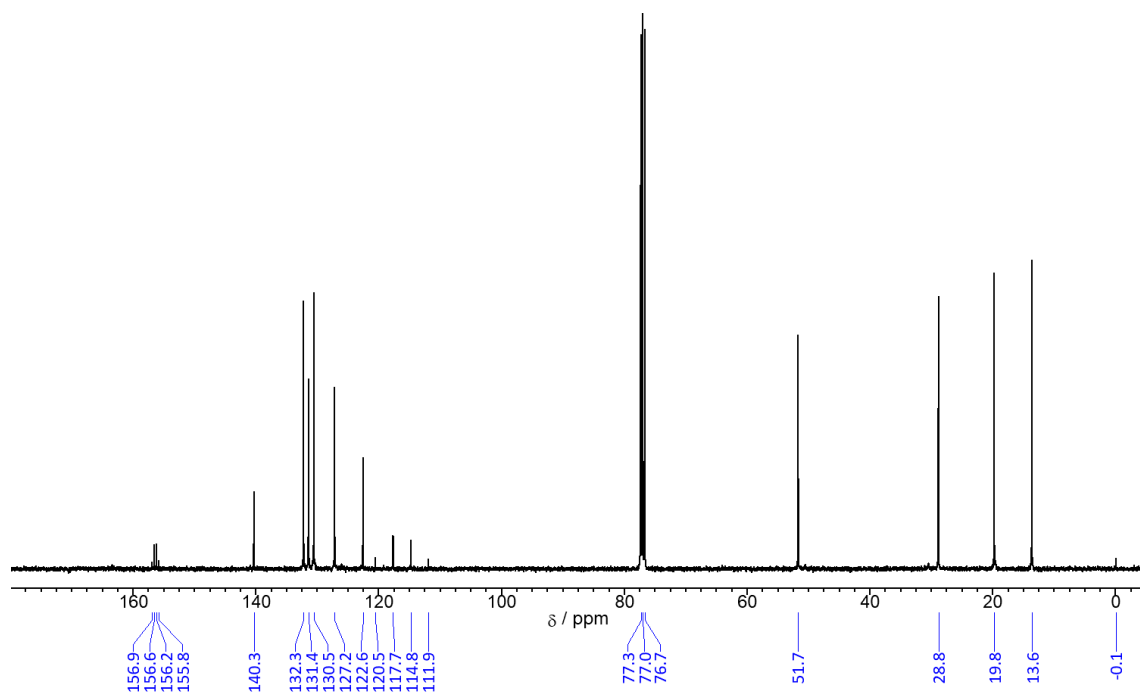

$^{13}\text{C}$  NMR (100 MHz) spectrum of **29**, measured in chloroform-*d* at room temperature.

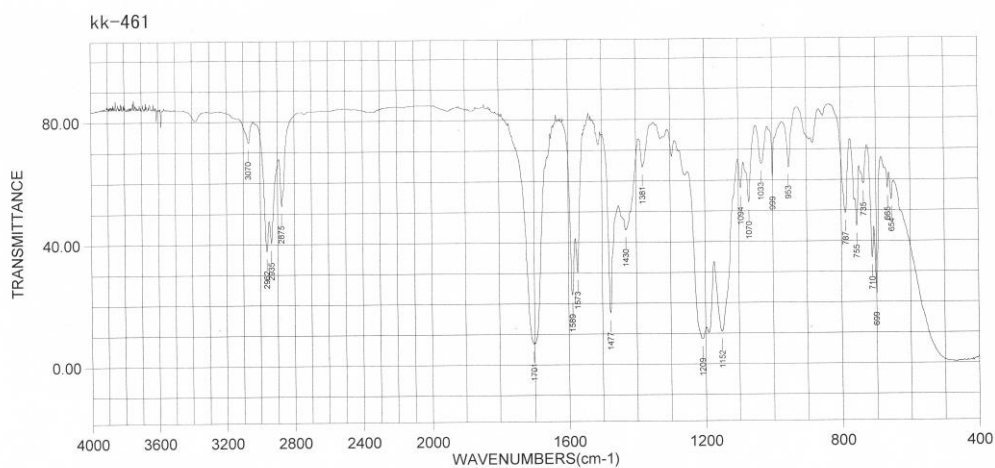

|          |                      |         |       |         |       |        |       |
|----------|----------------------|---------|-------|---------|-------|--------|-------|
| RESOL    | : 2 cm <sup>-1</sup> | 3070.16 | 73.28 | 1209.16 | 8.27  | 710.65 | 34.60 |
| SCANS    | : 5                  | 2962.16 | 37.71 | 1152.27 | 10.67 | 699.08 | 22.79 |
| AMP GAIN | : x1                 | 2935.16 | 40.47 | 1094.42 | 57.48 | 665.33 | 57.25 |
| P. INT   | : 1 cm <sup>-1</sup> | 2875.38 | 52.46 | 1070.31 | 52.87 | 654.72 | 53.54 |
| BEAM     | : single             | 1701.89 | 6.80  | 1033.67 | 65.43 |        |       |
| S. SPEED | : TGS                | 1589.08 | 22.89 | 999.92  | 60.86 |        |       |
| M. DATE  | : 3/23/16            | 1573.65 | 30.24 | 953.64  | 64.29 |        |       |
| F. NAME  | : 測定中のデータ            | 1477.22 | 16.87 | 787.79  | 49.16 |        |       |
|          |                      | 1430.94 | 44.08 | 755.97  | 45.00 |        |       |
|          |                      | 1381.76 | 64.52 | 735.72  | 58.68 |        |       |

IR spectrum of **29**.

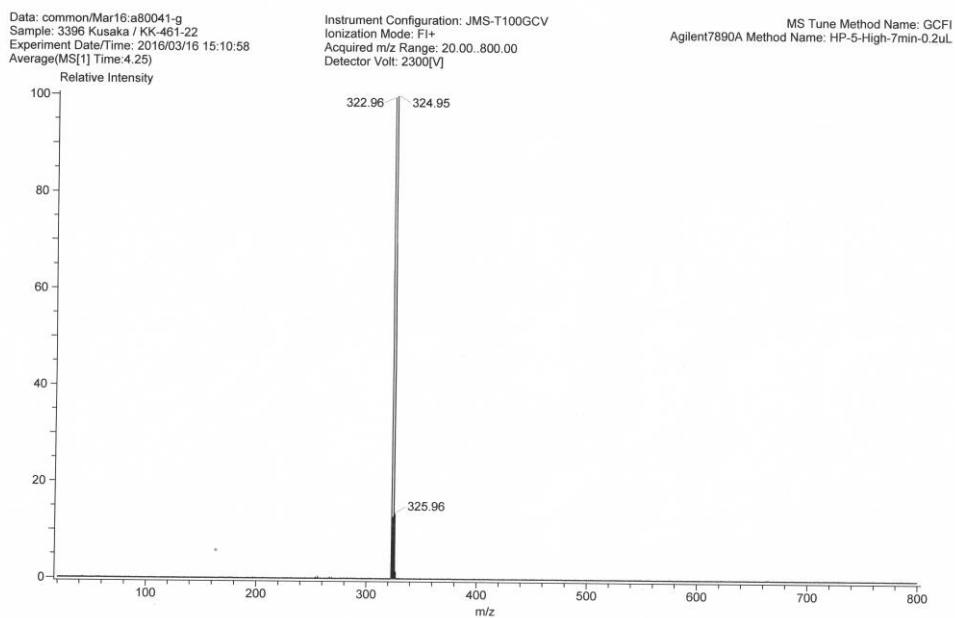

Mass spectrum (FD) of **29**.

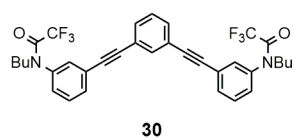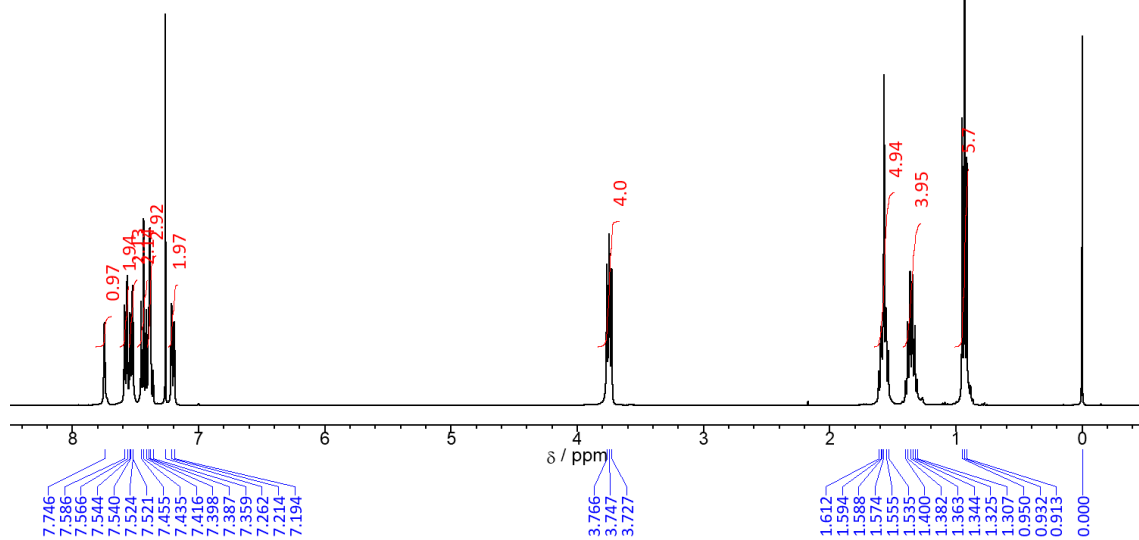

<sup>1</sup>H NMR (400 MHz) spectrum of **30**, measured in chloroform-*d* at room temperature.

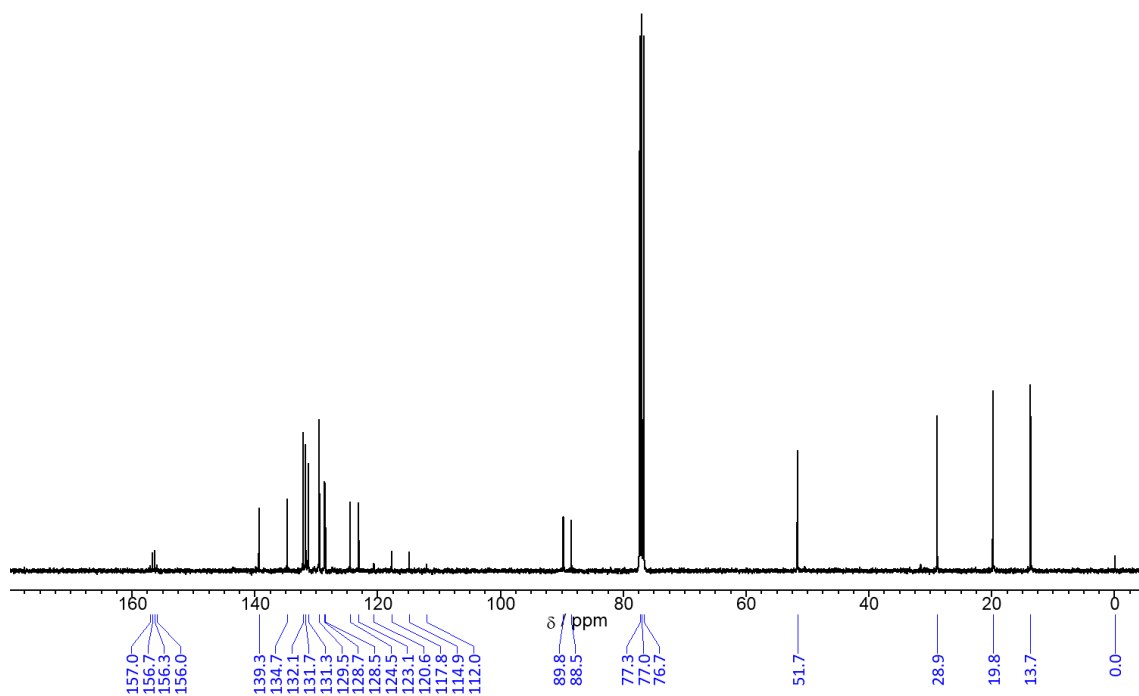

<sup>13</sup>C NMR (100 MHz) spectrum of **30**, measured in chloroform-*d* at room temperature.

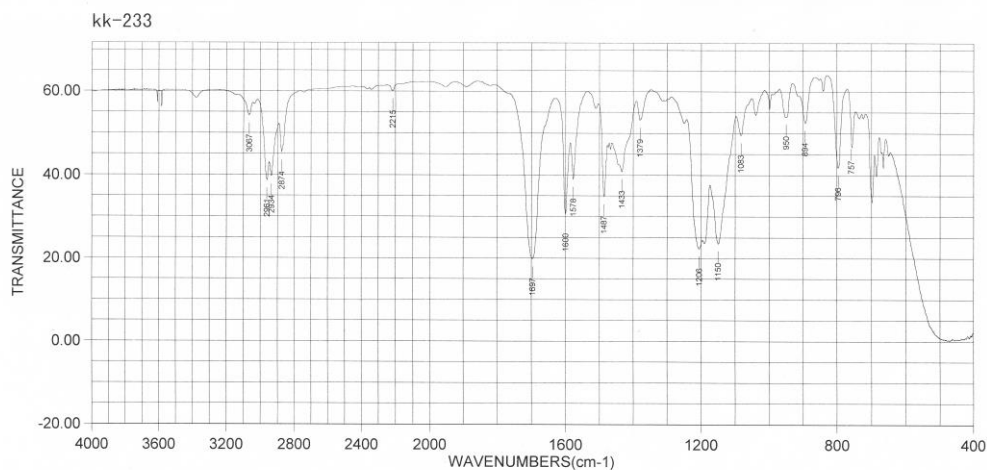

|          |           |      |         |       |         |       |
|----------|-----------|------|---------|-------|---------|-------|
| RESOL    | : 2       | cm-1 | 3067.26 | 54.15 | 1379.83 | 53.19 |
| SCANS    | : 5       |      | 2961.20 | 38.66 | 1206.27 | 22.34 |
| AMPGAIN  | : x1      |      | 2934.20 | 39.61 | 1150.34 | 23.59 |
| P. INT   | : 1       | cm-1 | 2874.41 | 45.30 | 1083.81 | 49.51 |
| BEAM     | : single  |      | 2215.84 | 60.07 | 950.75  | 54.01 |
| S. SPEED | : TGS     |      | 1697.07 | 19.87 | 894.82  | 52.48 |
| M. DATE  | : 3/27/16 |      | 1600.65 | 30.56 | 796.47  | 41.82 |
| F. NAME  | : 測定中のデータ |      | 1578.47 | 38.97 | 757.90  | 48.17 |
|          |           |      | 1487.83 | 34.83 |         |       |
|          |           |      | 1433.83 | 40.86 |         |       |

### IR spectrum of 30.

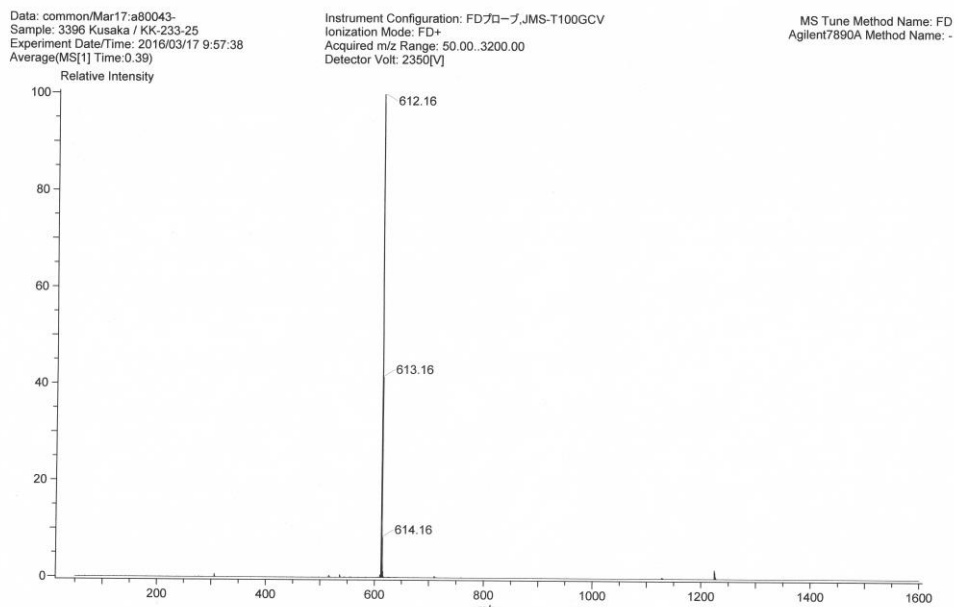

### Mass spectrum (FD) of 30.

### <sup>1</sup>H NMR spectra of new compounds (unprotected)

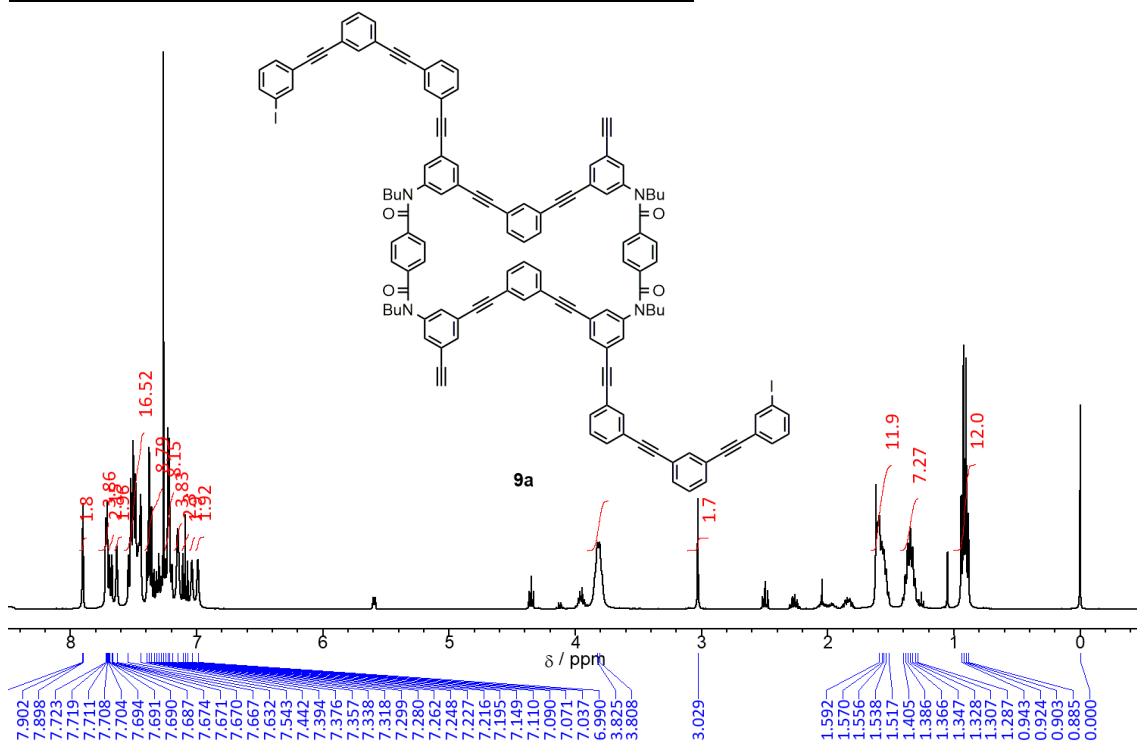

<sup>1</sup>H NMR spectrum (400 MHz) of **9a** cont. residual solvents (ethanol and ethyl acetate etc.), measured in chloroform-*d* at room temperature.

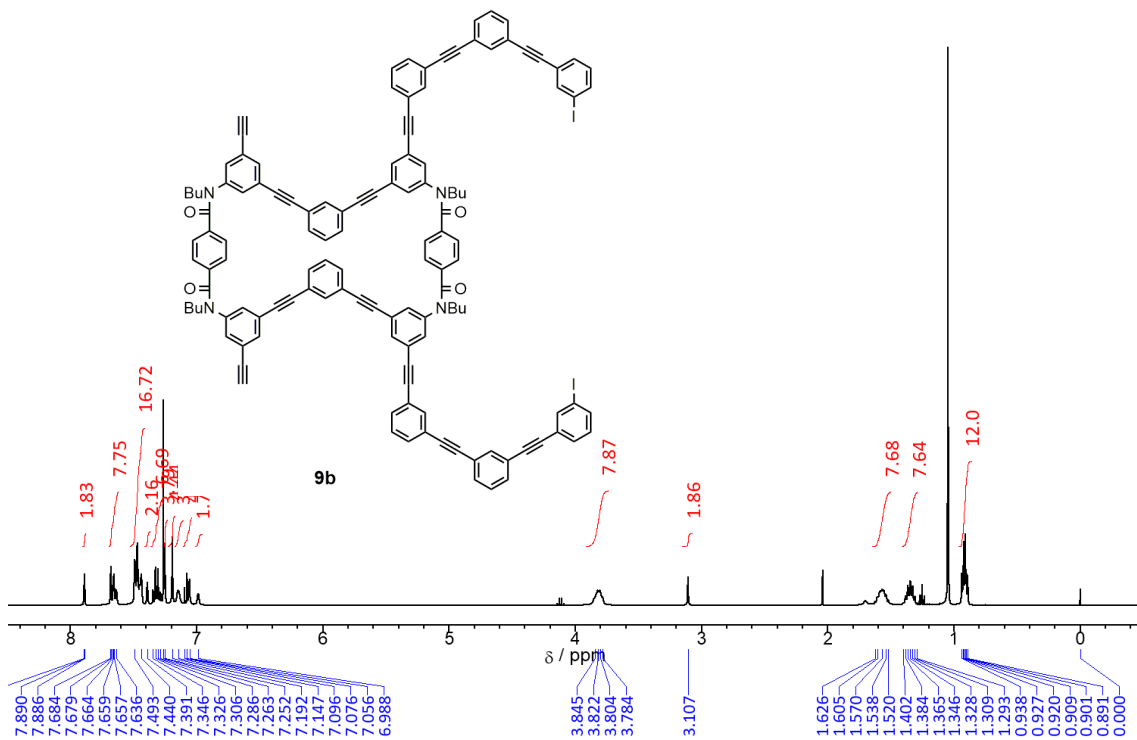

<sup>1</sup>H NMR spectrum (400 MHz) of **9b** cont. residual solvents (ethyl acetate etc.), measured in chloroform-*d* at room temperature.

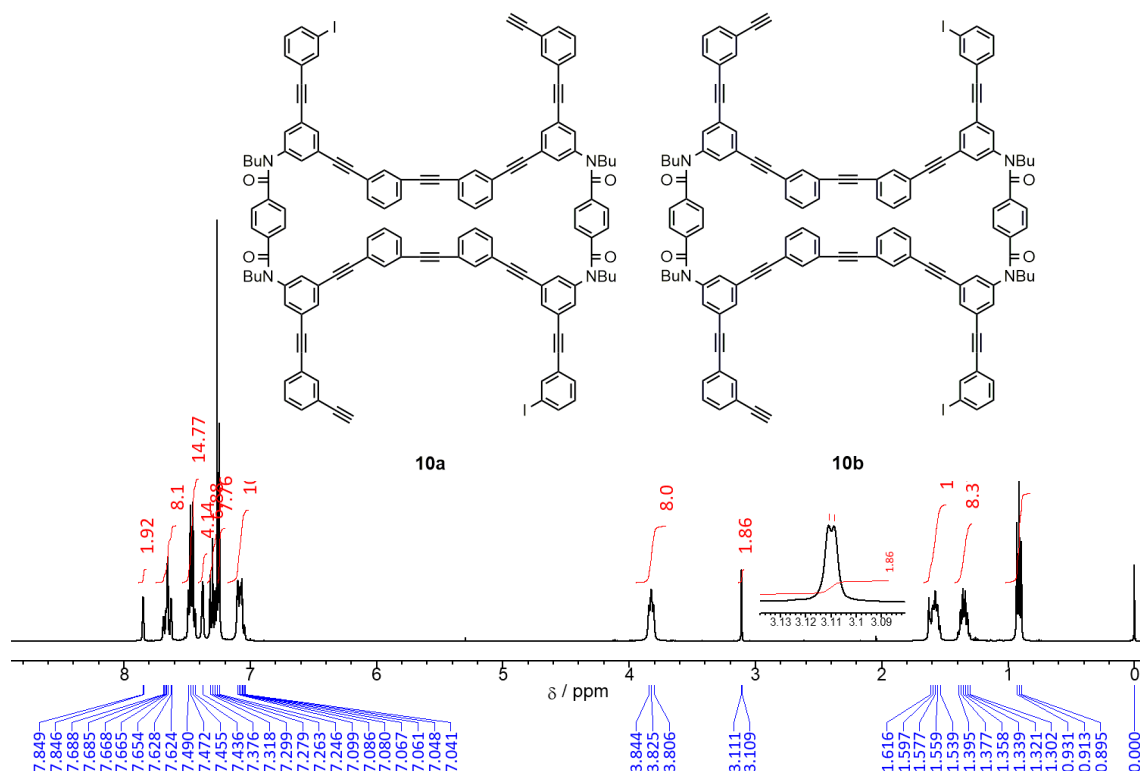

$^1\text{H}$  NMR spectrum (400 MHz) of **10a** and **10b**, measured in chloroform-*d* at room temperature.

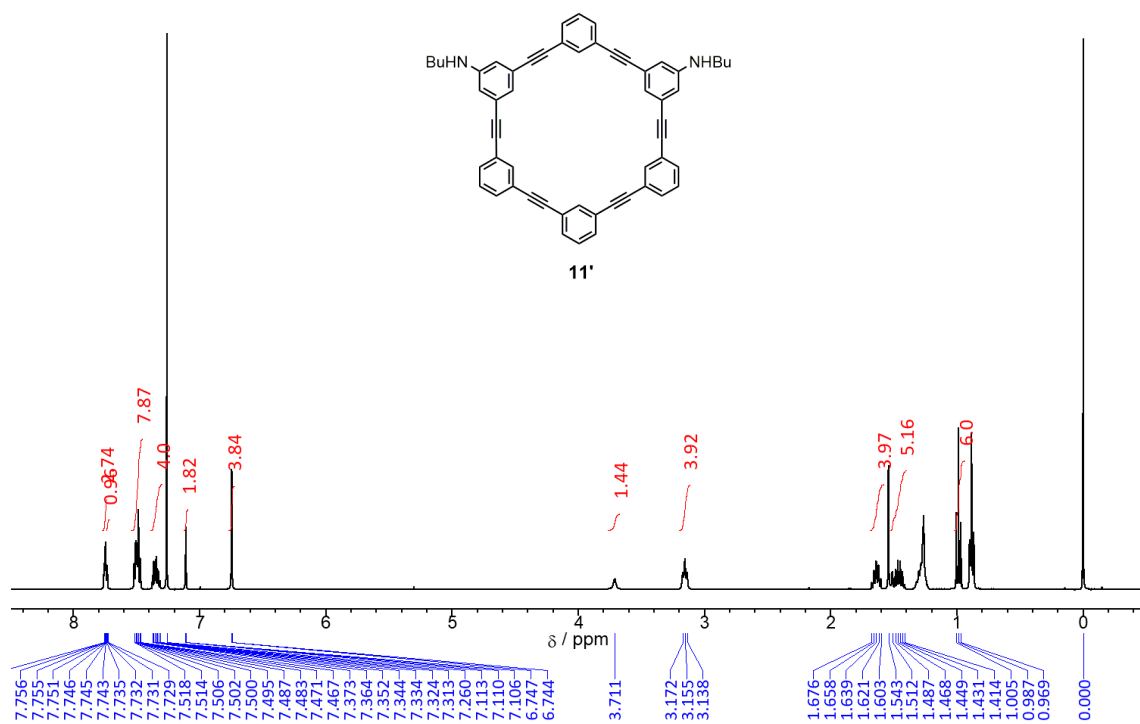

$^1\text{H}$  NMR spectrum (400 MHz) of **11'** cont. residual solvents (hexane), measured in chloroform-*d* at room temperature.



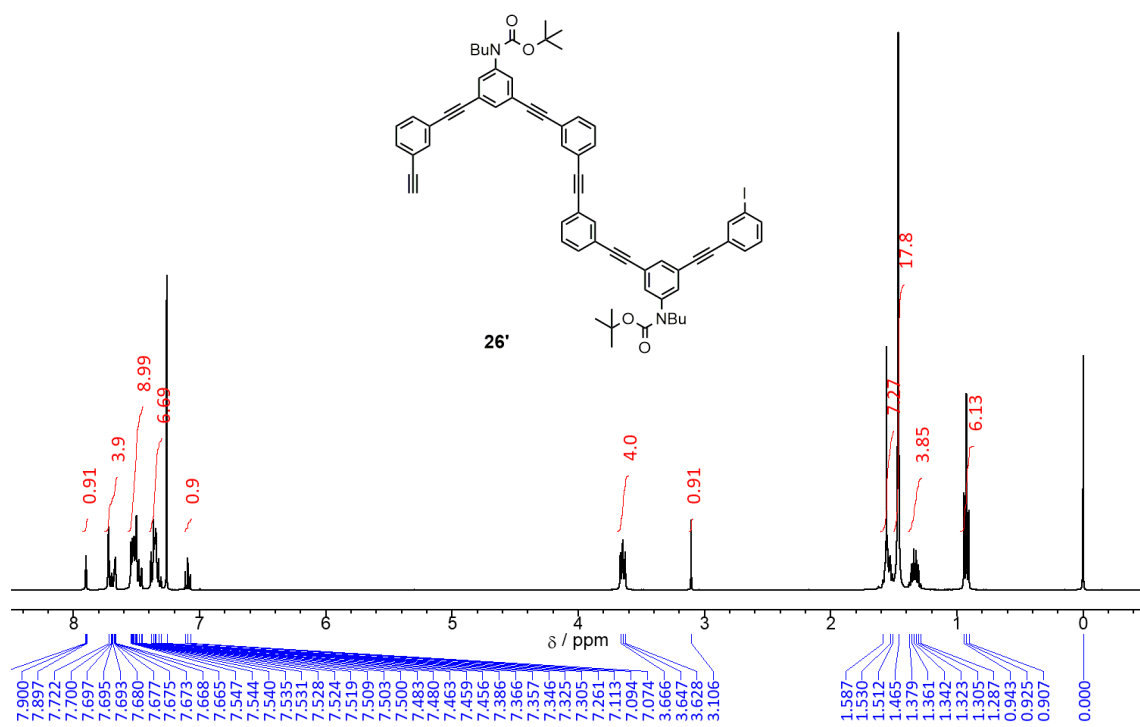

$^1\text{H}$  NMR spectrum (400 MHz) of **26'**, measured in chloroform-*d* at room temperature.

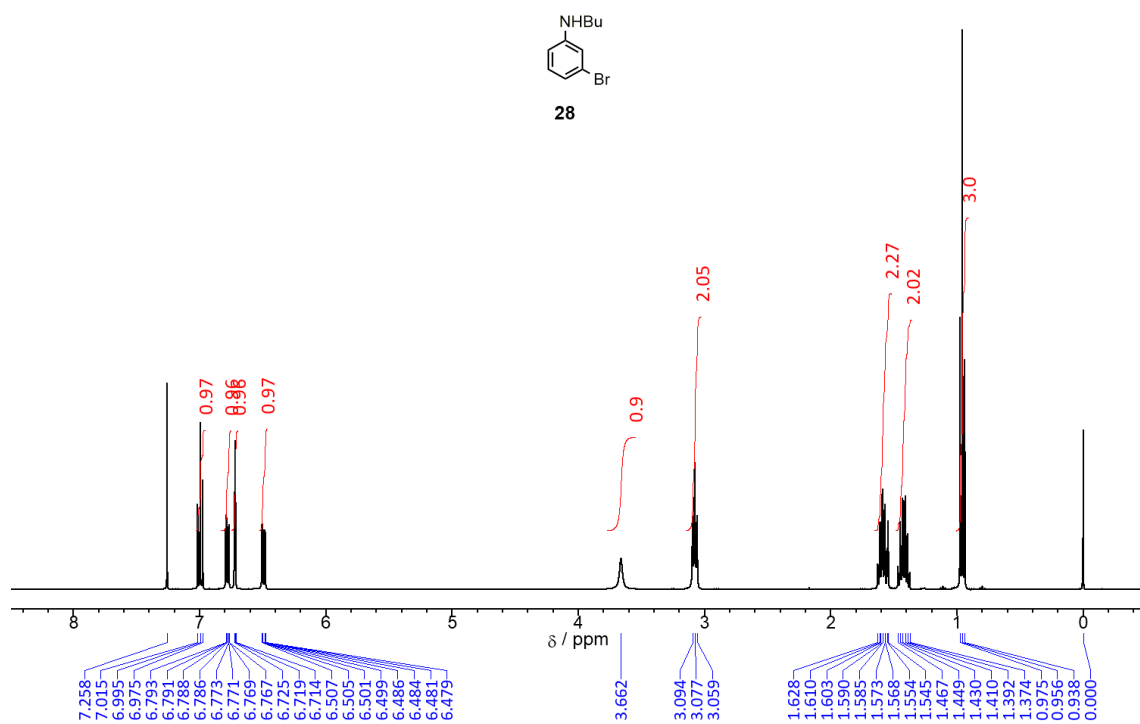

$^1\text{H}$  NMR spectrum (400 MHz) of **28**, measured in chloroform-*d* at room temperature.

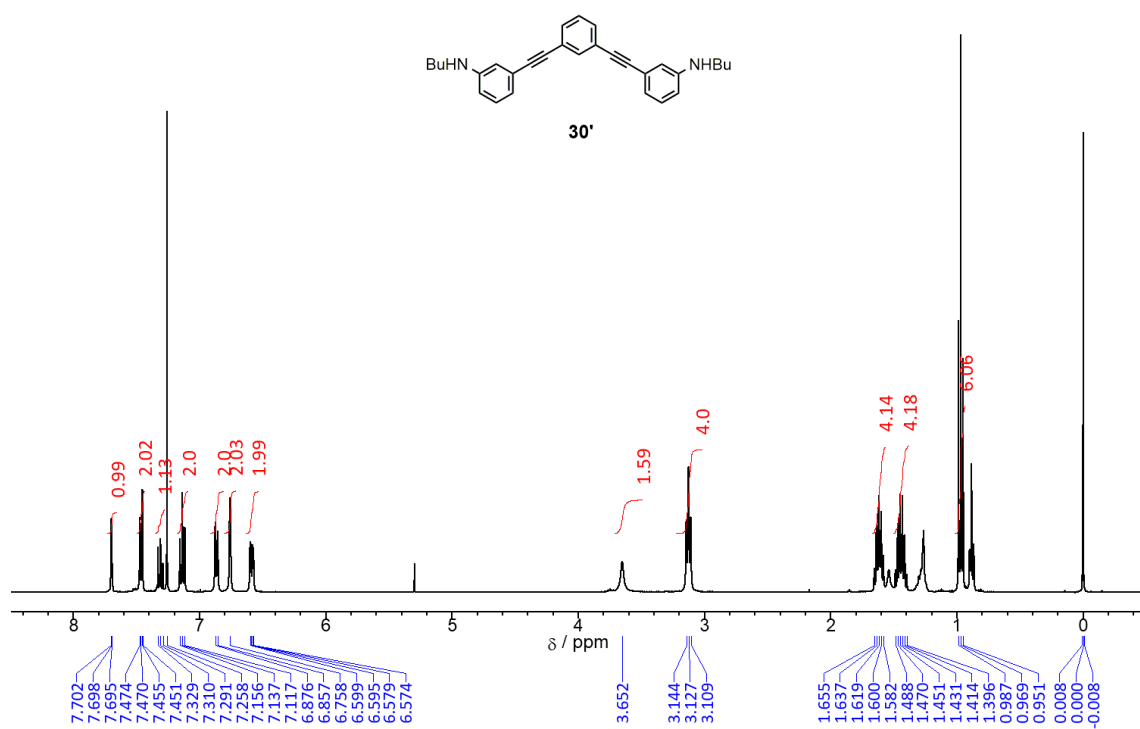

$^1\text{H}$  NMR spectrum (400 MHz) of **30'** cont. residual solvents (dichloromethane and hexane), measured in chloroform-*d* at room temperature.

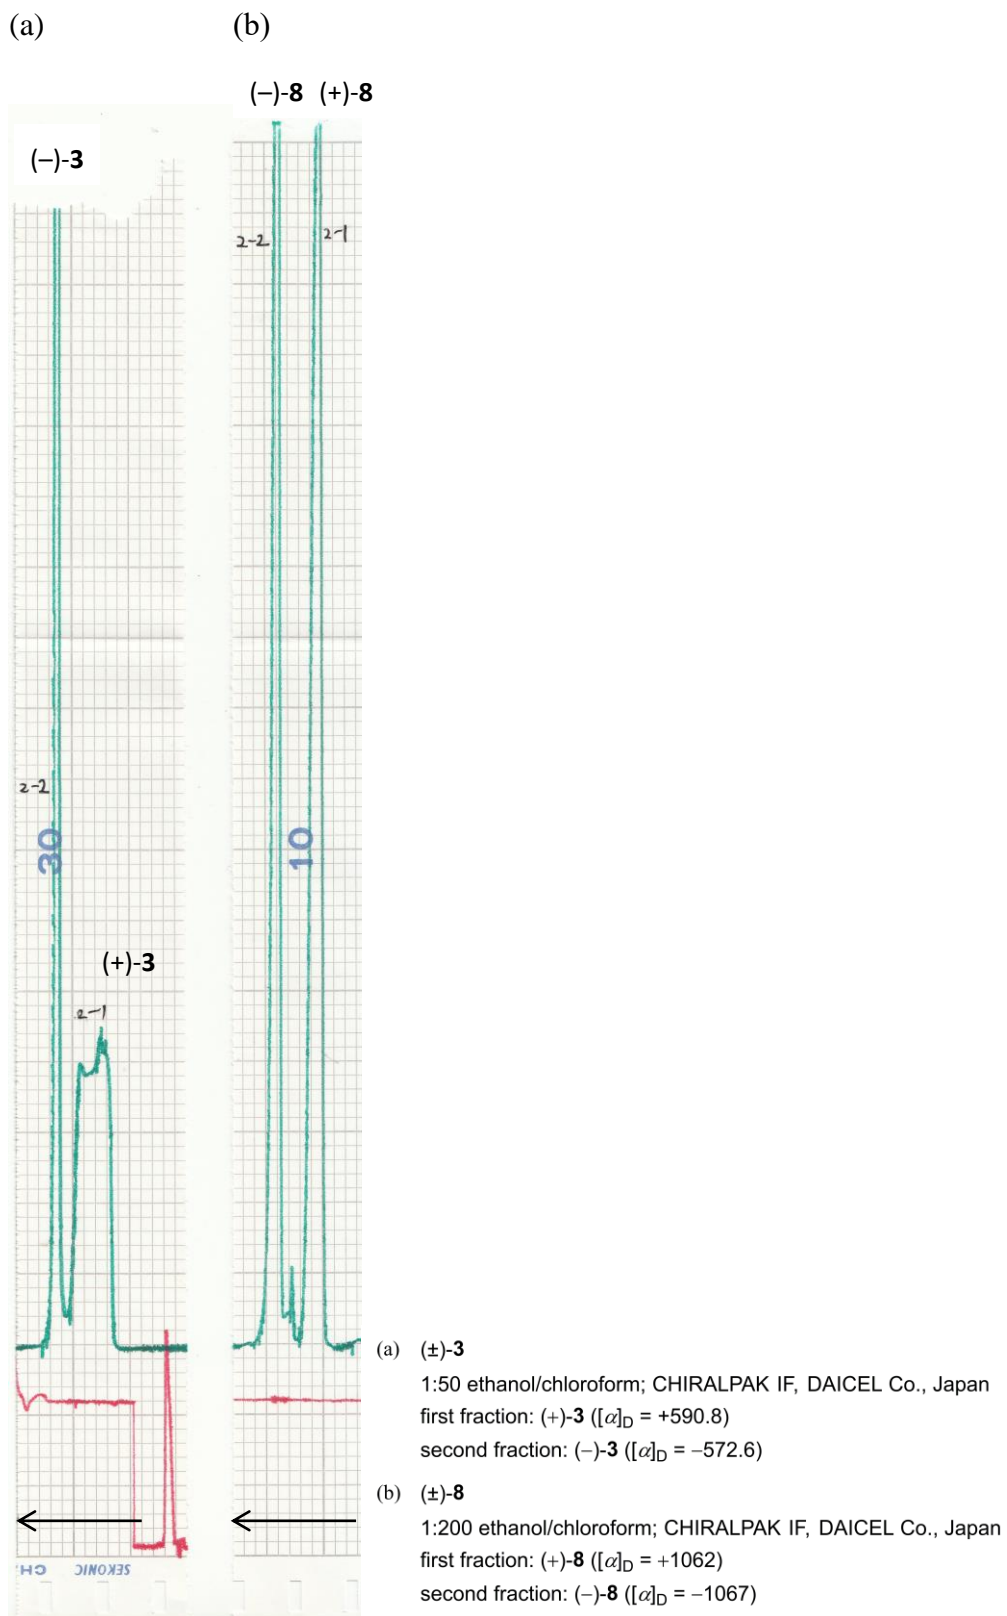

Chiral HPLC traces, detected by UV at 254 nm (green lines).
